# Supplementary material for: Identification of a small mutation panel of coding sequences to predict the efficacy of immunotherapy for lung adenocarcinoma
Source: J Transl Med. 2020 Jan 14;18:25. doi: 10.1186/s12967-019-02199-6 (PMC6961230; doi:10.1186/s12967-019-02199-6)
Supplement: Supplementary file 5 — Additional file 5: Table S4. List of differently expressed genes between high-TMB and low-TMB groups predicted via the 106-CDS panel. [file 12967_2019_2199_MOESM5_ESM.xls]

## Sheet: Sheet1
Table S4. List of differently expressed genes between high-TMB and low-TMB groups predicted via the 106-CDS panel
Gene ID	t	p	FDR
440590	10.0161	3.62318e-21	3.14982e-17
11004	9.8389	7.12628e-21	3.14982e-17
3833	9.86088	5.93467e-21	3.14982e-17
83540	9.95446	3.31272e-21	3.14982e-17
60401	-9.64278	3.21153e-20	1.1356e-16
4751	9.50303	1.08306e-19	3.19141e-16
22974	9.39934	2.33363e-19	5.16283e-16
4605	9.39658	2.39028e-19	5.16283e-16
54478	9.44566	2.62814e-19	5.16283e-16
1058	9.36193	3.81048e-19	6.73693e-16
3068	9.30171	5.43092e-19	8.00156e-16
91687	9.32385	5.00887e-19	8.00156e-16
55165	9.24783	7.95154e-19	1.08141e-15
55388	9.2495	9.94122e-19	1.25543e-15
55355	9.18623	1.43342e-18	1.68952e-15
10024	9.16003	1.89076e-18	2.08928e-15
991	9.12745	2.04506e-18	2.10331e-15
11065	9.11703	2.26034e-18	2.10331e-15
4436	9.17743	2.22671e-18	2.10331e-15
51087	9.17804	3.07494e-18	2.71825e-15
7153	9.05958	3.29917e-18	2.77759e-15
7272	9.0808	3.60204e-18	2.89473e-15
113130	9.05655	3.83922e-18	2.9512e-15
10293	9.0197	5.71392e-18	4.20926e-15
6596	9.02946	6.66165e-18	4.52992e-15
9212	8.99478	6.59824e-18	4.52992e-15
132671	-8.94735	8.0329e-18	5.0722e-15
79866	9.01293	7.93343e-18	5.0722e-15
1434	8.94337	9.22136e-18	5.62185e-15
55143	8.93551	9.68963e-18	5.71042e-15
9319	8.9091	1.19529e-17	6.817e-15
2189	8.93144	1.29089e-17	6.98583e-15
54892	8.91077	1.30392e-17	6.98583e-15
57650	8.93104	1.41233e-17	7.13429e-15
10615	8.88495	1.38918e-17	7.13429e-15
151648	8.91197	1.47685e-17	7.253e-15
221150	8.89365	1.5482e-17	7.39791e-15
150468	8.8426	2.1602e-17	1.00506e-14
163786	8.83939	2.29405e-17	1.03997e-14
729533	8.88353	2.65569e-17	1.17382e-14
23397	8.76949	3.61395e-17	1.5584e-14
9631	8.77289	4.49892e-17	1.89383e-14
79980	8.71982	4.7936e-17	1.97095e-14
151246	8.76722	5.24192e-17	2.1063e-14
699	8.70753	5.73957e-17	2.25501e-14
23310	8.70316	7.69612e-17	2.95799e-14
29089	8.64843	7.99399e-17	3.0071e-14
4171	8.66536	8.26692e-17	3.04498e-14
146956	8.64515	9.22846e-17	3.3098e-14
27338	8.65756	9.3603e-17	3.3098e-14
9833	8.59923	1.26244e-16	4.37646e-14
54069	8.54523	2.13832e-16	7.27028e-14
84296	8.57949	2.2046e-16	7.33163e-14
79000	8.549	2.2393e-16	7.33163e-14
1111	8.54259	2.3583e-16	7.58087e-14
5347	8.48507	3.07001e-16	9.69245e-14
8318	8.49191	3.27284e-16	1.01515e-13
1163	8.47953	3.57705e-16	1.09038e-13
57116	8.55795	3.90129e-16	1.14958e-13
146909	8.44757	3.86551e-16	1.14958e-13
7516	8.42669	4.77786e-16	1.36246e-13
2205	-8.40817	4.71255e-16	1.36246e-13
65005	8.42147	5.1465e-16	1.44429e-13
10189	8.37936	6.41894e-16	1.76034e-13
55299	8.39499	6.47185e-16	1.76034e-13
84722	8.39594	6.88141e-16	1.82353e-13
5984	8.39635	6.91042e-16	1.82353e-13
4232	8.36351	7.47142e-16	1.94257e-13
3838	8.33105	8.39371e-16	2.15074e-13
55732	8.3252	9.61848e-16	2.42935e-13
259266	8.32379	1.00306e-15	2.46308e-13
4175	8.31351	9.95745e-16	2.46308e-13
83596	8.31594	1.05309e-15	2.5505e-13
11073	8.32318	1.26077e-15	2.97205e-13
56992	8.30187	1.2475e-15	2.97205e-13
9493	8.28794	1.28584e-15	2.99127e-13
29899	8.26932	1.45754e-15	3.34667e-13
220134	8.27868	1.5339e-15	3.47684e-13
79723	8.2037	2.28795e-15	5.12037e-13
10635	8.20971	2.63733e-15	5.82851e-13
4173	8.18432	2.679e-15	5.84749e-13
55771	8.17122	2.9139e-15	6.20696e-13
375444	8.22089	2.90661e-15	6.20696e-13
24137	8.16231	3.01819e-15	6.35257e-13
2305	8.15792	3.19572e-15	6.6471e-13
8438	8.15158	3.55759e-15	7.22968e-13
1869	8.13872	3.54357e-15	7.22968e-13
79075	8.15484	3.82777e-15	7.69034e-13
26999	-8.13455	4.1735e-15	8.29073e-13
9700	8.13172	4.38241e-15	8.60901e-13
1063	8.10543	4.6044e-15	8.9457e-13
55635	8.12422	4.71636e-15	9.06362e-13
10721	8.12888	5.46883e-15	1.03967e-12
84930	8.11157	5.63674e-15	1.06019e-12
80178	8.08044	5.72955e-15	1.0663e-12
286826	8.09351	6.01947e-15	1.10859e-12
8914	8.0799	6.44063e-15	1.17392e-12
10403	8.052	7.3264e-15	1.32174e-12
113115	8.06352	7.43187e-15	1.32723e-12
27085	8.05727	7.59509e-15	1.34281e-12
5265	-8.03043	7.71431e-15	1.35039e-12
3832	8.02454	8.41321e-15	1.44413e-12
79172	8.04705	8.33462e-15	1.44413e-12
147700	8.05688	8.53695e-15	1.45128e-12
29127	8.03778	8.63444e-15	1.45388e-12
9928	8.01448	1.01265e-14	1.68902e-12
11130	7.99397	1.02704e-14	1.69702e-12
653820	8.0636	1.07183e-14	1.75463e-12
29980	7.96923	1.23093e-14	1.99659e-12
51514	7.96288	1.27286e-14	2.04584e-12
54443	7.93327	1.5635e-14	2.49034e-12
116832	7.93826	1.68654e-14	2.66233e-12
9088	7.9181	1.84204e-14	2.83194e-12
5983	7.95899	1.83698e-14	2.83194e-12
9735	7.92373	1.83895e-14	2.83194e-12
10926	7.9314	1.91571e-14	2.9198e-12
89958	7.90491	1.96991e-14	2.95281e-12
4998	7.91797	1.97077e-14	2.95281e-12
9156	7.89196	2.24731e-14	3.30807e-12
6944	7.90392	2.2455e-14	3.30807e-12
11169	7.89733	2.28272e-14	3.30807e-12
701	7.89366	2.26692e-14	3.30807e-12
9837	7.88002	2.35298e-14	3.38217e-12
899	7.86942	2.48915e-14	3.54904e-12
83461	7.87842	2.62782e-14	3.71679e-12
51065	-7.8557	2.66705e-14	3.74234e-12
790	7.85486	2.93279e-14	4.08281e-12
5284	-7.84195	3.07683e-14	4.19037e-12
78995	7.85357	3.08115e-14	4.19037e-12
55627	7.83876	3.0662e-14	4.19037e-12
9787	7.81461	3.73669e-14	5.04311e-12
728833	7.87689	3.90514e-14	5.19119e-12
6790	7.80194	3.89849e-14	5.19119e-12
9133	7.79488	4.17461e-14	5.50799e-12
23165	7.81305	4.25678e-14	5.53381e-12
23381	7.79477	4.22635e-14	5.53381e-12
1580	-7.78273	4.37065e-14	5.64037e-12
64151	7.79279	4.52294e-14	5.79461e-12
10452	7.77776	5.00235e-14	6.3627e-12
51319	7.79537	5.33733e-14	6.74028e-12
3295	-7.7619	5.38382e-14	6.75077e-12
3619	7.75358	6.75032e-14	8.28789e-12
641	7.75598	6.6668e-14	8.28789e-12
128239	7.7278	6.72438e-14	8.28789e-12
5471	7.73956	6.94371e-14	8.46654e-12
332	7.71293	7.31587e-14	8.85922e-12
84079	7.72581	7.9985e-14	9.61997e-12
1033	7.711	8.1529e-14	9.73941e-12
80174	7.71344	8.3352e-14	9.89036e-12
1763	7.71348	8.75853e-14	1.0255e-11
26586	7.70203	8.7406e-14	1.0255e-11
55257	7.69533	9.21448e-14	1.07179e-11
22948	7.6776	9.93875e-14	1.14848e-11
6502	7.70474	1.07537e-13	1.23458e-11
116328	-7.69217	1.08812e-13	1.24116e-11
5427	7.65444	1.25711e-13	1.4242e-11
3159	7.64738	1.26471e-13	1.4242e-11
9055	7.64255	1.27317e-13	1.42466e-11
10460	7.6306	1.30837e-13	1.45485e-11
675	7.66348	1.34786e-13	1.48939e-11
57405	7.63968	1.39918e-13	1.53649e-11
911	-7.60762	1.47939e-13	1.61455e-11
79929	7.67029	1.50258e-13	1.62979e-11
5881	7.61702	1.57159e-13	1.69425e-11
55131	7.59513	1.83031e-13	1.9612e-11
81624	7.58048	2.03808e-13	2.17068e-11
990	7.56524	2.05257e-13	2.17302e-11
115353	7.56388	2.19903e-13	2.31421e-11
5424	7.55661	2.24136e-13	2.3448e-11
1841	7.55181	2.25663e-13	2.3469e-11
9401	7.54825	2.44501e-13	2.52794e-11
890	7.54341	2.49513e-13	2.56211e-11
146556	-7.53647	2.50704e-13	2.56211e-11
56897	7.5353	2.66663e-13	2.70954e-11
442213	-7.52877	2.68845e-13	2.7161e-11
84823	7.52766	2.72521e-13	2.73759e-11
83903	7.54015	2.84379e-13	2.84057e-11
956	-7.51178	3.072e-13	3.05129e-11
51512	7.49675	3.4565e-13	3.41401e-11
8703	7.49563	3.50068e-13	3.43844e-11
5394	7.49238	3.5618e-13	3.47915e-11
220042	7.50582	3.75688e-13	3.64954e-11
2146	7.48215	3.79433e-13	3.66578e-11
9812	-7.45537	4.43586e-13	4.26228e-11
729438	7.48703	4.79743e-13	4.58479e-11
7098	-7.4406	5.2472e-13	4.98766e-11
5202	7.41503	5.84394e-13	5.52518e-11
1062	7.42726	5.92095e-13	5.56821e-11
9986	7.41179	6.01188e-13	5.62381e-11
2491	7.40064	6.91693e-13	6.43638e-11
11200	7.39509	7.06899e-13	6.50936e-11
3712	-7.38928	7.03883e-13	6.50936e-11
10733	7.39545	7.13532e-13	6.53639e-11
86	7.39597	7.63351e-13	6.95672e-11
8317	7.37819	8.07545e-13	7.32174e-11
913	-7.34727	8.67186e-13	7.82237e-11
4482	-7.35483	8.77823e-13	7.87813e-11
7283	7.34469	9.03692e-13	8.02878e-11
4176	7.3539	9.01435e-13	8.02878e-11
29128	7.34502	9.46948e-13	8.37102e-11
5902	7.35476	1.05183e-12	9.25187e-11
81620	7.32617	1.06009e-12	9.27843e-11
5985	7.32559	1.1984e-12	1.04373e-10
22823	7.31655	1.24794e-12	1.08155e-10
5888	7.30215	1.3222e-12	1.14032e-10
340061	-7.2901	1.40766e-12	1.20812e-10
10262	7.28498	1.42321e-12	1.21558e-10
6581	-7.2818	1.48449e-12	1.25578e-10
50489	-7.26725	1.48079e-12	1.25578e-10
84128	7.2653	1.55604e-12	1.31004e-10
55248	7.26467	1.61571e-12	1.35383e-10
5558	7.2765	1.64691e-12	1.37346e-10
162681	7.27284	1.74539e-12	1.44875e-10
9585	7.243	1.92391e-12	1.58947e-10
91442	7.25319	2.06656e-12	1.69939e-10
57864	-7.22318	2.1542e-12	1.76325e-10
284403	7.21961	2.19032e-12	1.77871e-10
113791	-7.21846	2.19321e-12	1.77871e-10
983	7.21096	2.27735e-12	1.83852e-10
3978	7.2132	2.5273e-12	2.03103e-10
79915	7.19875	2.6866e-12	2.14928e-10
23560	7.17588	2.74357e-12	2.18497e-10
90381	7.19248	2.76621e-12	2.19312e-10
3797	7.19422	2.87582e-12	2.26985e-10
10466	7.18385	3.11622e-12	2.44865e-10
5933	7.1561	3.26183e-12	2.55174e-10
995	7.15288	3.41285e-12	2.65811e-10
898	7.1536	3.46242e-12	2.6849e-10
9276	7.15831	3.49346e-12	2.68541e-10
51103	-7.15824	3.49009e-12	2.68541e-10
2237	7.14514	3.56947e-12	2.73196e-10
6878	7.1396	3.63418e-12	2.7695e-10
10036	7.14455	3.66815e-12	2.78339e-10
10800	-7.13411	3.72237e-12	2.81246e-10
2976	7.13954	4.04372e-12	3.01031e-10
11022	7.12636	4.03902e-12	3.01031e-10
144097	7.13106	4.05235e-12	3.01031e-10
5725	7.12345	4.03741e-12	3.01031e-10
29028	7.11197	4.29926e-12	3.18037e-10
7514	7.11029	4.48483e-12	3.30382e-10
3925	7.11203	4.57147e-12	3.33982e-10
7542	7.11052	4.56999e-12	3.33982e-10
11062	7.12209	4.62812e-12	3.36729e-10
57491	7.17412	4.71137e-12	3.41381e-10
4796	7.1065	4.82842e-12	3.47018e-10
2956	7.10649	4.82365e-12	3.47018e-10
5546	7.08979	5.19011e-12	3.71503e-10
813	7.08623	5.23261e-12	3.73034e-10
51203	7.0726	5.51781e-12	3.91786e-10
375449	-7.07149	5.64248e-12	3.99036e-10
1479	7.07348	5.79977e-12	4.08526e-10
26271	7.07763	6.04324e-12	4.23986e-10
2842	7.09088	6.16076e-12	4.30523e-10
151188	7.08744	6.38019e-12	4.44101e-10
672	7.05356	6.82621e-12	4.73284e-10
11339	7.05394	6.97805e-12	4.81922e-10
9775	7.0397	7.21702e-12	4.96486e-10
9253	7.03696	7.45715e-12	5.11017e-10
47	7.02286	7.89276e-12	5.3878e-10
151194	7.04445	7.99874e-12	5.43914e-10
84515	7.02434	8.30652e-12	5.62679e-10
1512	-7.0079	8.34041e-12	5.62818e-10
5457	7.14107	8.42615e-12	5.66442e-10
3607	7.00619	8.53037e-12	5.71276e-10
966	-6.99962	8.80435e-12	5.874e-10
79595	7.00621	9.0347e-12	6.00502e-10
8824	-6.99121	9.1558e-12	6.0542e-10
993	7.00917	9.17717e-12	6.0542e-10
1896	-6.98784	9.31805e-12	6.12428e-10
8382	-6.98665	9.36447e-12	6.132e-10
25886	6.99542	9.71082e-12	6.33533e-10
22934	6.98232	9.99153e-12	6.4945e-10
80179	6.98099	1.00825e-11	6.52963e-10
54893	-6.96426	1.11204e-11	7.17548e-10
7170	6.97431	1.13256e-11	7.28133e-10
55723	6.9603	1.14559e-11	7.33652e-10
23636	6.97503	1.14944e-11	7.33652e-10
54742	6.98657	1.25656e-11	7.99136e-10
54517	6.94885	1.26329e-11	8.0054e-10
8833	6.95683	1.28443e-11	8.11025e-10
84343	6.9518	1.29827e-11	8.16848e-10
23594	6.95225	1.31656e-11	8.25417e-10
5319	-6.92862	1.37846e-11	8.61172e-10
54888	6.93307	1.39505e-11	8.68047e-10
10212	6.93125	1.39928e-11	8.68047e-10
3608	6.92359	1.49802e-11	9.26047e-10
55722	6.94037	1.51134e-11	9.31031e-10
81930	6.93176	1.52909e-11	9.38689e-10
4013	-6.92518	1.55315e-11	9.50161e-10
10404	-6.90389	1.65366e-11	1.00816e-09
11338	6.8984	1.72403e-11	1.04745e-09
114905	-6.89086	1.75427e-11	1.06101e-09
260293	-6.9024	1.75835e-11	1.06101e-09
4784	-6.89462	1.76718e-11	1.06271e-09
64708	6.88727	1.85875e-11	1.10649e-09
6092	-6.88188	1.85692e-11	1.10649e-09
11222	6.88835	1.84817e-11	1.10649e-09
7083	6.86587	2.05907e-11	1.22162e-09
79954	6.86806	2.13306e-11	1.26129e-09
83732	6.8698	2.16269e-11	1.27455e-09
147841	6.8648	2.17773e-11	1.27914e-09
1870	6.87406	2.37293e-11	1.38919e-09
8607	6.84617	2.44149e-11	1.4246e-09
10535	6.83723	2.56962e-11	1.49032e-09
55656	6.83274	2.57096e-11	1.49032e-09
84790	6.83495	2.61567e-11	1.50635e-09
51530	6.84519	2.61243e-11	1.50635e-09
57504	6.8382	2.75409e-11	1.58092e-09
1473	-6.82829	2.82026e-11	1.61366e-09
55661	6.81374	2.86151e-11	1.63198e-09
55839	6.82226	2.89583e-11	1.64625e-09
11266	6.82803	2.90977e-11	1.64887e-09
55835	6.85082	2.92521e-11	1.64924e-09
7690	6.83601	2.92909e-11	1.64924e-09
57647	6.80436	3.05438e-11	1.71433e-09
84319	6.81387	3.1098e-11	1.73489e-09
6491	6.81224	3.11064e-11	1.73489e-09
3014	6.79614	3.26395e-11	1.81467e-09
909	-6.78561	3.38889e-11	1.87823e-09
10099	-6.78602	3.46468e-11	1.91423e-09
3426	-6.79841	3.52693e-11	1.94256e-09
90957	6.78294	3.54546e-11	1.9467e-09
5496	6.78219	3.57551e-11	1.95712e-09
79682	6.77405	3.76316e-11	2.05348e-09
10992	6.78203	3.81857e-11	2.07548e-09
10606	6.7715	3.82696e-11	2.07548e-09
4258	-6.76424	4.04382e-11	2.18638e-09
5426	6.77304	4.06548e-11	2.19139e-09
7203	6.75768	4.08107e-11	2.19311e-09
6897	6.75397	4.33984e-11	2.3251e-09
63967	6.76411	4.44888e-11	2.37632e-09
29893	6.75405	4.55344e-11	2.42484e-09
55706	6.74313	4.78228e-11	2.53906e-09
93594	6.74939	4.93053e-11	2.60993e-09
10592	6.7524	4.98171e-11	2.62915e-09
900	-6.72804	5.07597e-11	2.663e-09
79102	6.75281	5.07127e-11	2.663e-09
79801	6.72735	5.21495e-11	2.72782e-09
23649	6.72806	5.39888e-11	2.8157e-09
6733	6.73445	5.50498e-11	2.86259e-09
65062	6.73584	5.54743e-11	2.8762e-09
153830	-6.7075	5.67082e-11	2.93158e-09
55215	6.70933	6.01167e-11	3.09873e-09
4288	6.69799	6.1193e-11	3.14503e-09
7468	6.70954	6.22787e-11	3.19156e-09
165530	-6.69297	6.36261e-11	3.25118e-09
79902	6.68832	6.63717e-11	3.3817e-09
10713	6.68773	6.71911e-11	3.41362e-09
9633	6.71427	6.82827e-11	3.44962e-09
8453	6.68805	6.82901e-11	3.44962e-09
203068	6.6744	6.95237e-11	3.50193e-09
387103	6.67613	7.13616e-11	3.5843e-09
154	-6.66623	7.22738e-11	3.61983e-09
2160	-6.6818	7.47472e-11	3.72262e-09
8562	6.66719	7.46446e-11	3.72262e-09
7905	-6.66089	7.66641e-11	3.80736e-09
285605	-6.65191	7.99129e-11	3.95759e-09
25926	6.64744	8.14919e-11	4.02451e-09
124936	-6.63693	8.74184e-11	4.29587e-09
4129	-6.64345	8.74726e-11	4.29587e-09
79080	6.64031	8.82596e-11	4.32252e-09
65082	6.63721	9.26395e-11	4.49092e-09
1894	6.63332	9.27141e-11	4.49092e-09
580	6.65301	9.21892e-11	4.49092e-09
100533111	6.66006	9.26311e-11	4.49092e-09
26750	6.62522	9.31765e-11	4.4942e-09
6839	6.66101	9.32903e-11	4.4942e-09
10459	6.63365	9.38538e-11	4.50628e-09
54974	-6.62589	9.40508e-11	4.50628e-09
285440	-6.62539	9.5587e-11	4.56751e-09
3148	6.62926	9.88475e-11	4.71058e-09
55789	6.62336	9.91375e-11	4.7117e-09
23584	-6.61142	1.01736e-10	4.82223e-09
84418	-6.5966	1.13672e-10	5.37356e-09
157313	6.60318	1.16168e-10	5.47695e-09
127602	6.59806	1.17534e-10	5.52661e-09
23518	6.59056	1.18569e-10	5.56045e-09
200933	6.59645	1.21353e-10	5.66582e-09
2705	-6.58557	1.21456e-10	5.66582e-09
93323	6.60118	1.26143e-10	5.86896e-09
6741	6.59184	1.26979e-10	5.89234e-09
9918	6.59008	1.28092e-10	5.92844e-09
200186	6.58704	1.30606e-10	6.02904e-09
5982	6.57303	1.34268e-10	6.18193e-09
79782	-6.56135	1.42437e-10	6.54103e-09
4580	6.56081	1.43928e-10	6.59234e-09
3475	6.56779	1.45511e-10	6.64764e-09
84255	6.55945	1.48488e-10	6.76618e-09
23534	6.55203	1.51676e-10	6.89363e-09
55010	6.55979	1.55516e-10	7.05005e-09
7298	6.5485	1.57013e-10	7.09972e-09
1788	6.55319	1.58311e-10	7.14013e-09
11185	-6.53756	1.59015e-10	7.15364e-09
2960	6.55743	1.67561e-10	7.519e-09
8520	6.54706	1.69656e-10	7.59373e-09
9675	6.52863	1.74386e-10	7.78573e-09
11005	-6.51644	1.83613e-10	8.177e-09
27339	6.53506	1.87234e-10	8.31734e-09
55038	6.52742	1.90224e-10	8.40789e-09
80119	6.53047	1.90224e-10	8.40789e-09
55813	6.50877	1.93048e-10	8.51144e-09
492311	-6.50456	1.95573e-10	8.60134e-09
23306	6.52201	1.96989e-10	8.6421e-09
6723	6.50132	1.98854e-10	8.68084e-09
9868	6.51795	1.9882e-10	8.68084e-09
160897	6.51538	2.04987e-10	8.92653e-09
83594	-6.50033	2.09014e-10	9.07953e-09
29888	6.49861	2.11558e-10	9.14588e-09
169714	6.50309	2.12093e-10	9.14588e-09
7112	6.5028	2.11907e-10	9.14588e-09
10963	6.47791	2.44288e-10	1.05085e-08
80762	-6.47233	2.45758e-10	1.05461e-08
116028	6.46826	2.5765e-10	1.10296e-08
1871	6.46664	2.59671e-10	1.10894e-08
51692	6.46686	2.62121e-10	1.1167e-08
6241	6.45913	2.64656e-10	1.12315e-08
7936	6.46642	2.64907e-10	1.12315e-08
891	6.45288	2.72435e-10	1.15231e-08
4085	6.46651	2.73398e-10	1.15362e-08
10103	-6.45288	2.78501e-10	1.17236e-08
372	6.46393	2.84072e-10	1.19033e-08
55689	6.45981	2.84118e-10	1.19033e-08
9656	6.45355	2.89068e-10	1.20821e-08
23234	6.45708	2.98746e-10	1.24571e-08
3835	6.4403	3.08596e-10	1.28376e-08
138639	6.43551	3.22836e-10	1.33985e-08
90865	-6.41764	3.31512e-10	1.37263e-08
2595	-6.41687	3.3238e-10	1.37301e-08
8458	6.41917	3.37132e-10	1.38939e-08
4361	6.42889	3.4043e-10	1.39972e-08
5708	6.4206	3.41837e-10	1.40224e-08
10322	6.41015	3.51061e-10	1.43675e-08
10112	6.40991	3.53147e-10	1.44195e-08
10742	-6.40573	3.55747e-10	1.44922e-08
84908	6.40742	3.6423e-10	1.48037e-08
5871	6.40778	3.70185e-10	1.50112e-08
27306	-6.39901	3.71038e-10	1.50114e-08
83990	6.40281	3.72364e-10	1.50306e-08
348793	6.41914	3.76175e-10	1.51154e-08
84991	6.40652	3.75912e-10	1.51154e-08
55095	6.40329	3.86842e-10	1.55088e-08
195828	6.4138	3.88019e-10	1.55207e-08
5831	6.37714	4.22753e-10	1.6872e-08
54996	-6.38334	4.23711e-10	1.68721e-08
54927	6.38334	4.48762e-10	1.78295e-08
55695	6.36764	4.51593e-10	1.79017e-08
343099	6.37437	4.53511e-10	1.79375e-08
6877	6.3952	4.58616e-10	1.80989e-08
50484	-6.3587	4.71239e-10	1.85557e-08
51208	-6.35988	4.7899e-10	1.8819e-08
1755	-6.35174	4.91361e-10	1.92622e-08
730005	-6.34968	4.99069e-10	1.95211e-08
1519	-6.36767	5.00458e-10	1.95322e-08
11100	6.36088	5.06704e-10	1.97324e-08
3026	-6.34748	5.09903e-10	1.98134e-08
81928	6.3488	5.1199e-10	1.98508e-08
30	-6.34789	5.14863e-10	1.99185e-08
29959	6.35962	5.16361e-10	1.99329e-08
84259	6.35308	5.2034e-10	2.00427e-08
8726	6.34905	5.40196e-10	2.07623e-08
5557	6.36147	5.57978e-10	2.13992e-08
10342	6.34643	5.6263e-10	2.1531e-08
3980	6.32873	5.93257e-10	2.2654e-08
7443	6.34835	5.99607e-10	2.2798e-08
26472	6.31898	5.98422e-10	2.2798e-08
10797	6.32175	6.02148e-10	2.28455e-08
1515	6.33827	6.10476e-10	2.31118e-08
2175	6.33017	6.1928e-10	2.3395e-08
192111	6.31599	6.21296e-10	2.34211e-08
51430	6.31195	6.24862e-10	2.35054e-08
3145	6.31555	6.30908e-10	2.36825e-08
55799	-6.30724	6.4241e-10	2.40123e-08
64793	6.32355	6.41167e-10	2.40123e-08
10652	6.30869	6.44093e-10	2.40244e-08
200373	-6.30746	6.45802e-10	2.40374e-08
55291	6.32705	6.53436e-10	2.42705e-08
249	-6.30524	6.57484e-10	2.43696e-08
28964	6.31139	6.65063e-10	2.4599e-08
92799	6.30432	6.73936e-10	2.48751e-08
8394	6.31655	6.81934e-10	2.51179e-08
283248	6.3205	6.86347e-10	2.52248e-08
51182	6.30633	6.87689e-10	2.52248e-08
1314	6.30976	7.02032e-10	2.56976e-08
6009	6.29908	7.19356e-10	2.62773e-08
2177	6.29648	7.22646e-10	2.6343e-08
253714	6.30913	7.34079e-10	2.67048e-08
5050	6.28226	7.51661e-10	2.71766e-08
65260	6.2865	7.50602e-10	2.71766e-08
57129	6.29512	7.48697e-10	2.71766e-08
2627	-6.28101	7.55249e-10	2.72506e-08
201501	-6.28083	7.66446e-10	2.75983e-08
22976	6.28831	7.83568e-10	2.81575e-08
59343	6.28565	7.91226e-10	2.8375e-08
23350	6.27608	8.21069e-10	2.93856e-08
55166	6.27723	8.5936e-10	3.06939e-08
54467	6.26772	8.6898e-10	3.09749e-08
1820	6.27201	8.96462e-10	3.18903e-08
1856	6.26508	9.05849e-10	3.21595e-08
140883	6.2807	9.29671e-10	3.2939e-08
2187	6.26286	9.39339e-10	3.3215e-08
131076	6.25168	9.44515e-10	3.33314e-08
9657	6.2518	9.66436e-10	3.4037e-08
3191	6.24439	9.70392e-10	3.41084e-08
54821	6.24967	9.84546e-10	3.45372e-08
84904	6.2489	9.97095e-10	3.48392e-08
7374	6.24713	9.9622e-10	3.48392e-08
78999	6.23563	1.00366e-09	3.49994e-08
57082	6.25179	1.0091e-09	3.50507e-08
8208	6.23891	1.00733e-09	3.50507e-08
2053	-6.23165	1.01567e-09	3.52098e-08
22983	6.25337	1.03623e-09	3.58525e-08
10198	6.24391	1.04463e-09	3.60723e-08
23089	6.24367	1.0501e-09	3.61907e-08
80018	6.22731	1.06501e-09	3.66332e-08
140733	-6.22652	1.06836e-09	3.66769e-08
256979	6.32321	1.0807e-09	3.70286e-08
1802	6.22263	1.09259e-09	3.73635e-08
87178	6.22071	1.10739e-09	3.77966e-08
84105	-6.2147	1.13832e-09	3.87775e-08
9442	6.22707	1.14469e-09	3.89194e-08
283420	-6.20361	1.18554e-09	4.02312e-08
6474	6.27933	1.23897e-09	4.19634e-08
6451	-6.2194	1.25324e-09	4.23656e-08
121268	6.2064	1.25708e-09	4.24143e-08
9015	6.20226	1.26154e-09	4.2484e-08
975	-6.19525	1.28946e-09	4.33415e-08
25879	6.19169	1.29509e-09	4.34482e-08
7084	-6.18724	1.30963e-09	4.38527e-08
81610	6.18867	1.32003e-09	4.41176e-08
84842	6.20269	1.33899e-09	4.46667e-08
6541	6.18801	1.35271e-09	4.50395e-08
55631	6.17914	1.41595e-09	4.70562e-08
56902	6.17619	1.42451e-09	4.72521e-08
222229	6.16509	1.50214e-09	4.97336e-08
54908	6.17951	1.51299e-09	4.99995e-08
3772	-6.16207	1.51937e-09	5.01165e-08
6330	-6.16062	1.52611e-09	5.02451e-08
55798	6.16056	1.60114e-09	5.25197e-08
8886	6.16688	1.59969e-09	5.25197e-08
57510	6.15856	1.62978e-09	5.33601e-08
25913	6.17341	1.64299e-09	5.36932e-08
5591	6.14541	1.72148e-09	5.61544e-08
26155	6.13495	1.80224e-09	5.86808e-08
4893	6.13835	1.81669e-09	5.90424e-08
7913	6.14251	1.89362e-09	6.14298e-08
79871	6.14045	1.90321e-09	6.16277e-08
2115	-6.12133	1.91928e-09	6.20344e-08
9330	6.12437	1.99317e-09	6.43052e-08
84836	-6.11864	2.02926e-09	6.53502e-08
1789	6.13241	2.04909e-09	6.58689e-08
1736	6.11291	2.07066e-09	6.63624e-08
55210	6.10901	2.07195e-09	6.63624e-08
2150	-6.11725	2.10346e-09	6.71285e-08
4849	6.12013	2.09969e-09	6.71285e-08
23285	6.11237	2.15125e-09	6.85298e-08
9134	6.12157	2.16591e-09	6.88728e-08
6996	6.11217	2.17572e-09	6.90607e-08
51605	6.10363	2.22391e-09	7.04637e-08
221914	6.12934	2.23524e-09	7.0696e-08
554282	6.13958	2.26259e-09	7.14331e-08
55322	6.10264	2.32816e-09	7.33723e-08
29843	6.1034	2.35044e-09	7.39427e-08
4256	-6.08732	2.37417e-09	7.45566e-08
81875	6.09304	2.3803e-09	7.46166e-08
51593	6.08731	2.38953e-09	7.47732e-08
13	-6.086	2.4762e-09	7.73485e-08
84902	6.08551	2.51101e-09	7.82974e-08
6666	6.07397	2.55624e-09	7.95674e-08
284338	6.09492	2.56578e-09	7.97239e-08
57696	6.06693	2.67426e-09	8.29491e-08
26205	6.06976	2.69194e-09	8.33513e-08
7398	6.07287	2.74606e-09	8.48781e-08
5519	6.06354	2.92535e-09	9.02622e-08
26984	6.05879	2.95709e-09	9.10825e-08
22950	6.05368	2.98759e-09	9.1862e-08
9191	6.04945	3.02924e-09	9.29809e-08
9824	6.05552	3.0801e-09	9.43783e-08
22919	6.04399	3.10784e-09	9.50634e-08
1832	6.04164	3.12686e-09	9.54799e-08
81608	6.06402	3.18983e-09	9.72349e-08
9219	6.04736	3.22184e-09	9.80414e-08
27244	-6.02786	3.32126e-09	1.00893e-07
84864	6.0345	3.33832e-09	1.01238e-07
22836	6.02975	3.34733e-09	1.01337e-07
51659	6.03096	3.44019e-09	1.0397e-07
201299	6.039	3.53674e-09	1.06706e-07
55055	6.02861	3.6136e-09	1.08839e-07
79733	6.02324	3.62345e-09	1.0895e-07
10346	-6.02105	3.65355e-09	1.09483e-07
79134	6.02492	3.64861e-09	1.09483e-07
10799	6.01437	3.68806e-09	1.1033e-07
9183	6.01985	3.74169e-09	1.11745e-07
165055	6.02024	3.79415e-09	1.13034e-07
80143	6.01478	3.79764e-09	1.13034e-07
1471	-6.00537	3.80962e-09	1.132e-07
4141	6.008	3.95794e-09	1.1741e-07
5709	5.99817	3.99563e-09	1.1833e-07
130827	6.00455	4.04877e-09	1.19304e-07
81615	-5.99753	4.03967e-09	1.19304e-07
81848	-5.99304	4.04735e-09	1.19304e-07
9125	6.00584	4.09473e-09	1.20457e-07
1947	-5.98863	4.13002e-09	1.21294e-07
10165	5.99308	4.14676e-09	1.21583e-07
79691	5.99793	4.20543e-09	1.23099e-07
55791	5.98727	4.40682e-09	1.28781e-07
23509	5.97959	4.43745e-09	1.29462e-07
100130933	-5.9786	4.48842e-09	1.30734e-07
27101	5.98077	4.50057e-09	1.30872e-07
26973	5.9766	4.6664e-09	1.3547e-07
1857	5.97925	4.67403e-09	1.3547e-07
84306	5.97522	4.82699e-09	1.39675e-07
5710	5.96623	4.84184e-09	1.39875e-07
27102	5.96609	4.85e-09	1.39882e-07
3070	5.96472	4.98674e-09	1.43592e-07
29102	5.96915	5.00546e-09	1.43897e-07
26065	5.96196	5.1243e-09	1.46598e-07
85476	5.96781	5.11926e-09	1.46598e-07
11030	-5.95962	5.1182e-09	1.46598e-07
340526	-5.95366	5.15565e-09	1.47257e-07
9092	5.95161	5.26446e-09	1.50122e-07
9254	-5.9457	5.28615e-09	1.50498e-07
22995	5.98232	5.29852e-09	1.50607e-07
6929	5.94907	5.38227e-09	1.52742e-07
120892	-5.94052	5.46823e-09	1.54933e-07
80324	5.93807	5.54523e-09	1.56864e-07
56852	5.95204	5.61085e-09	1.58466e-07
10155	5.94254	5.68926e-09	1.60424e-07
9141	5.93782	5.81844e-09	1.63806e-07
6941	5.93576	5.86153e-09	1.64757e-07
4193	-5.92537	5.95833e-09	1.67211e-07
2176	5.94838	6.06012e-09	1.69799e-07
388335	-5.91853	6.21415e-09	1.73839e-07
64839	-5.91723	6.34535e-09	1.7702e-07
79968	5.92533	6.34788e-09	1.7702e-07
10051	5.92487	6.37719e-09	1.77231e-07
7286	5.93369	6.37153e-09	1.77231e-07
27303	-5.91315	6.38553e-09	1.77231e-07
126017	5.92125	6.40773e-09	1.77568e-07
51705	-5.90829	6.52442e-09	1.80519e-07
6045	5.91772	6.5643e-09	1.81339e-07
10577	-5.90598	6.64648e-09	1.83322e-07
2532	-5.89918	6.8817e-09	1.89515e-07
5074	5.9114	6.89643e-09	1.89625e-07
1104	5.89901	6.91517e-09	1.89845e-07
153222	-5.89394	7.09139e-09	1.94381e-07
79192	-5.89501	7.11593e-09	1.94752e-07
26100	5.899	7.18313e-09	1.96287e-07
9618	5.8924	7.2242e-09	1.97105e-07
25896	5.89042	7.26714e-09	1.97971e-07
1017	5.90251	7.37934e-09	2.00718e-07
9898	5.89234	7.40249e-09	2.01039e-07
54801	5.89979	7.57099e-09	2.05299e-07
56616	5.89116	7.63742e-09	2.06784e-07
9097	5.88388	7.6947e-09	2.08016e-07
55735	5.88153	7.86516e-09	2.12299e-07
79657	5.88205	8.0224e-09	2.16213e-07
6749	5.8874	8.08032e-09	2.17443e-07
55159	5.87555	8.18571e-09	2.19944e-07
115677	-5.86813	8.23805e-09	2.21015e-07
5717	5.86793	8.29928e-09	2.2232e-07
4001	5.86738	8.49524e-09	2.27225e-07
51639	5.86874	8.50823e-09	2.27229e-07
57447	-5.86984	8.53072e-09	2.27486e-07
79171	5.86617	8.58627e-09	2.28622e-07
7372	5.87613	8.62136e-09	2.29211e-07
80201	-5.86434	8.8719e-09	2.35518e-07
827	-5.85699	9.17643e-09	2.43237e-07
84811	5.86367	9.22794e-09	2.43991e-07
55705	5.85187	9.2394e-09	2.43991e-07
10734	5.90868	9.24626e-09	2.43991e-07
1191	-5.84705	9.30366e-09	2.4514e-07
1808	-5.84925	9.5301e-09	2.50732e-07
3176	-5.84392	9.63911e-09	2.53223e-07
1978	5.84924	9.75359e-09	2.55851e-07
55269	5.84684	1.01117e-08	2.64852e-07
51253	5.83046	1.03277e-08	2.70109e-07
79663	5.83508	1.03666e-08	2.70725e-07
221710	5.83896	1.04359e-08	2.72133e-07
414	-5.8354	1.05006e-08	2.73418e-07
55003	5.82786	1.0593e-08	2.75419e-07
6829	5.83062	1.06123e-08	2.75515e-07
10351	-5.81879	1.08984e-08	2.81748e-07
6035	-5.82055	1.09002e-08	2.81748e-07
5127	5.82772	1.08697e-08	2.81748e-07
6628	5.82382	1.09777e-08	2.82925e-07
10589	5.81651	1.09733e-08	2.82925e-07
910	-5.81566	1.11003e-08	2.84926e-07
7988	5.82341	1.1074e-08	2.84926e-07
29923	5.82992	1.11037e-08	2.84926e-07
9569	5.81261	1.14802e-08	2.94159e-07
6285	-5.80704	1.15578e-08	2.95719e-07
5225	-5.80507	1.16525e-08	2.9737e-07
55622	5.80834	1.1656e-08	2.9737e-07
9688	5.81404	1.17557e-08	2.99483e-07
55646	5.80989	1.18713e-08	3.01993e-07
4521	5.80449	1.19583e-08	3.03769e-07
160	5.80122	1.20397e-08	3.05399e-07
55872	5.80721	1.20596e-08	3.05463e-07
10195	5.80284	1.21624e-08	3.07628e-07
92105	5.80486	1.21805e-08	3.07645e-07
6631	5.80144	1.22908e-08	3.09987e-07
3784	-5.80237	1.2394e-08	3.11693e-07
125	-5.79377	1.24113e-08	3.11693e-07
6228	-5.79842	1.23915e-08	3.11693e-07
55247	5.8084	1.24426e-08	3.12036e-07
5718	5.7921	1.25375e-08	3.13971e-07
7336	5.79475	1.27965e-08	3.20004e-07
7103	-5.79113	1.29366e-08	3.22593e-07
3161	5.79348	1.29325e-08	3.22593e-07
59271	-5.79199	1.31197e-08	3.26646e-07
51669	-5.79373	1.3136e-08	3.26646e-07
348654	5.79532	1.31915e-08	3.27564e-07
6344	-5.78393	1.32204e-08	3.27822e-07
57621	5.77801	1.36833e-08	3.38824e-07
6469	-5.77876	1.37103e-08	3.39019e-07
10054	5.79312	1.3756e-08	3.39674e-07
6418	5.78034	1.38783e-08	3.42216e-07
55957	5.79703	1.39929e-08	3.44561e-07
10898	5.78036	1.40504e-08	3.45496e-07
126526	5.78076	1.41619e-08	3.47754e-07
728591	5.80361	1.43511e-08	3.51911e-07
27010	-5.76658	1.44889e-08	3.54715e-07
54926	5.7707	1.45056e-08	3.54715e-07
9126	5.78118	1.46219e-08	3.57064e-07
7247	5.78987	1.47424e-08	3.5951e-07
8487	5.77844	1.48168e-08	3.60828e-07
29081	5.76996	1.50682e-08	3.66446e-07
54884	-5.76361	1.51493e-08	3.67912e-07
10712	5.75986	1.52502e-08	3.69855e-07
23160	5.76004	1.53708e-08	3.72113e-07
1510	-5.76018	1.53854e-08	3.72113e-07
79913	5.75451	1.55535e-08	3.75664e-07
4678	5.75645	1.57573e-08	3.80067e-07
23512	5.75462	1.59955e-08	3.85287e-07
4603	5.7673	1.60378e-08	3.8578e-07
27300	5.74851	1.61149e-08	3.87108e-07
163081	5.75816	1.63237e-08	3.91591e-07
55660	5.75056	1.63821e-08	3.9246e-07
10985	5.74781	1.6423e-08	3.92908e-07
64682	5.75172	1.64899e-08	3.93572e-07
85459	5.76393	1.64953e-08	3.93572e-07
219844	5.75334	1.65988e-08	3.95508e-07
64499	-5.74264	1.67676e-08	3.98992e-07
221079	5.749	1.69169e-08	4.02005e-07
10874	5.7472	1.71449e-08	4.06874e-07
8741	-5.73915	1.71853e-08	4.07287e-07
6332	-5.73224	1.74642e-08	4.13344e-07
63922	5.73477	1.77177e-08	4.18782e-07
8270	5.73133	1.77832e-08	4.1977e-07
286827	5.74248	1.78695e-08	4.21245e-07
79022	5.73847	1.79761e-08	4.23192e-07
1994	5.73336	1.80293e-08	4.23879e-07
10552	5.74433	1.8137e-08	4.25846e-07
57787	5.72732	1.84169e-08	4.31845e-07
6882	5.7305	1.85356e-08	4.34053e-07
5013	5.72854	1.86849e-08	4.36969e-07
6683	5.72593	1.87546e-08	4.38021e-07
5217	5.7243	1.88069e-08	4.38663e-07
81611	5.72135	1.90567e-08	4.43903e-07
28960	5.72283	1.9161e-08	4.45745e-07
107282092	5.73408	1.97101e-08	4.57917e-07
3184	5.7132	1.97816e-08	4.58974e-07
1951	5.71321	2.06329e-08	4.77069e-07
55890	-5.71364	2.06012e-08	4.77069e-07
2838	5.71858	2.06424e-08	4.77069e-07
64927	-5.70457	2.09255e-08	4.8298e-07
80308	5.70011	2.10618e-08	4.85493e-07
395	-5.70136	2.12692e-08	4.88999e-07
25840	-5.70098	2.1254e-08	4.88999e-07
5257	-5.69739	2.15642e-08	4.94495e-07
10714	5.7082	2.15418e-08	4.94495e-07
7444	5.69436	2.19193e-08	5.01986e-07
8992	-5.68911	2.23034e-08	5.09159e-07
875	5.72177	2.23189e-08	5.09159e-07
760	-5.68829	2.22714e-08	5.09159e-07
8683	5.69155	2.24886e-08	5.1237e-07
64837	5.69079	2.27154e-08	5.16871e-07
6868	5.69041	2.27932e-08	5.17975e-07
5203	5.68838	2.28627e-08	5.18886e-07
23120	-5.68625	2.29391e-08	5.19953e-07
8634	5.68811	2.32985e-08	5.27423e-07
7525	5.68463	2.33683e-08	5.28326e-07
80017	-5.68882	2.34438e-08	5.29357e-07
541468	-5.67521	2.43629e-08	5.49408e-07
7335	5.67009	2.47762e-08	5.57562e-07
1524	-5.67097	2.47875e-08	5.57562e-07
50485	5.67279	2.48948e-08	5.59262e-07
83590	5.66686	2.50228e-08	5.61425e-07
57461	5.67643	2.53545e-08	5.67426e-07
10494	5.66708	2.53456e-08	5.67426e-07
133686	5.68434	2.57237e-08	5.74963e-07
79019	5.66524	2.59424e-08	5.79119e-07
55254	5.67186	2.59822e-08	5.79274e-07
5097	-5.66212	2.61615e-08	5.82537e-07
9972	5.66875	2.62119e-08	5.82927e-07
5528	5.6737	2.64854e-08	5.88269e-07
6242	5.65902	2.66395e-08	5.90259e-07
80243	-5.65533	2.66418e-08	5.90259e-07
10730	5.66016	2.68114e-08	5.93274e-07
23404	5.66007	2.71381e-08	5.99753e-07
10849	5.65608	2.75775e-08	6.08703e-07
57558	5.65711	2.76335e-08	6.09177e-07
219348	-5.64134	2.87987e-08	6.34075e-07
51306	-5.6444	2.92263e-08	6.42688e-07
4102	5.66217	2.93047e-08	6.4361e-07
55734	5.63879	2.95794e-08	6.48034e-07
7772	5.64746	2.95433e-08	6.48034e-07
115019	-5.63301	3.04223e-08	6.65675e-07
284358	5.65456	3.09451e-08	6.76279e-07
51406	5.63364	3.10175e-08	6.77025e-07
51434	5.62784	3.12258e-08	6.80729e-07
170506	5.63566	3.13744e-08	6.83128e-07
967	-5.62778	3.15785e-08	6.86724e-07
10643	5.63352	3.17379e-08	6.88499e-07
27000	5.62959	3.17086e-08	6.88499e-07
63979	5.62527	3.17798e-08	6.88562e-07
284071	5.69796	3.20773e-08	6.94157e-07
55324	5.62765	3.21859e-08	6.95656e-07
7068	-5.62936	3.22415e-08	6.96007e-07
404734	-5.61651	3.29963e-08	7.11432e-07
285704	-5.61349	3.34652e-08	7.20663e-07
65003	5.61999	3.36757e-08	7.24313e-07
84928	5.61275	3.41585e-08	7.32914e-07
80071	5.63221	3.41327e-08	7.32914e-07
10236	5.61907	3.46023e-08	7.41537e-07
1981	5.60813	3.51831e-08	7.53072e-07
114625	-5.60757	3.53299e-08	7.553e-07
116225	5.60676	3.5975e-08	7.68163e-07
352954	5.61776	3.60429e-08	7.68378e-07
79677	5.60976	3.60721e-08	7.68378e-07
10412	-5.59771	3.69457e-08	7.83464e-07
131177	-5.60194	3.68628e-08	7.83464e-07
10556	5.60569	3.69501e-08	7.83464e-07
201725	5.60921	3.69575e-08	7.83464e-07
80007	5.60479	3.71172e-08	7.85906e-07
23354	5.60355	3.75461e-08	7.92882e-07
9128	5.59541	3.75812e-08	7.92882e-07
132320	5.59908	3.75149e-08	7.92882e-07
65243	5.60305	3.77706e-08	7.94035e-07
6358	-5.59826	3.77379e-08	7.94035e-07
79023	5.59918	3.771e-08	7.94035e-07
11146	5.60381	3.79774e-08	7.97435e-07
91283	5.59114	3.84969e-08	8.07385e-07
7263	-5.59461	3.8565e-08	8.07854e-07
126549	5.61201	3.88515e-08	8.12892e-07
284992	5.60044	3.89252e-08	8.13472e-07
51010	5.59536	3.90687e-08	8.15507e-07
5111	5.59425	3.9254e-08	8.18409e-07
64374	-5.58501	3.98242e-08	8.29319e-07
9146	5.584	3.99234e-08	8.30406e-07
127733	-5.58168	4.03172e-08	8.37613e-07
80218	5.58843	4.11241e-08	8.53373e-07
81545	-5.57198	4.2034e-08	8.71231e-07
64969	5.57485	4.23878e-08	8.77536e-07
997	5.5728	4.27298e-08	8.83582e-07
142	5.57547	4.30785e-08	8.89752e-07
51012	5.57018	4.31569e-08	8.90332e-07
6780	5.56444	4.39357e-08	9.05342e-07
84955	5.57014	4.43628e-08	9.13078e-07
8348	5.58034	4.49177e-08	9.23425e-07
9270	5.57046	4.50689e-08	9.25456e-07
23092	-5.55992	4.53645e-08	9.30446e-07
10061	5.56044	4.54388e-08	9.30889e-07
79770	-5.56076	4.55851e-08	9.32806e-07
1717	5.55703	4.59341e-08	9.36751e-07
2977	-5.5548	4.59298e-08	9.36751e-07
50853	-5.55908	4.59368e-08	9.36751e-07
347404	-5.55417	4.60917e-08	9.38826e-07
8662	5.55688	4.61689e-08	9.39316e-07
10657	5.55577	4.63479e-08	9.41875e-07
30836	5.55721	4.64588e-08	9.43045e-07
115548	-5.55247	4.70342e-08	9.53628e-07
1730	-5.56327	4.7295e-08	9.57818e-07
55759	5.55675	4.75325e-08	9.61528e-07
29993	5.58243	4.76986e-08	9.63785e-07
90527	-5.54704	4.78855e-08	9.66455e-07
11321	5.55563	4.79818e-08	9.67296e-07
8813	5.5488	4.88421e-08	9.83517e-07
22944	5.54976	5.01463e-08	1.00798e-06
55157	5.54137	5.0171e-08	1.00798e-06
23590	5.53995	5.08014e-08	1.01949e-06
9704	5.53976	5.17417e-08	1.03718e-06
9445	-5.53724	5.18147e-08	1.03747e-06
10605	5.54065	5.29067e-08	1.05813e-06
387893	5.53011	5.30377e-08	1.05956e-06
8140	5.53246	5.31175e-08	1.05995e-06
1181	5.53717	5.34252e-08	1.06489e-06
100289678	5.53181	5.36085e-08	1.06734e-06
115004	5.53029	5.37912e-08	1.06977e-06
51154	5.52695	5.42196e-08	1.07708e-06
10128	5.52876	5.43857e-08	1.07917e-06
4116	5.52447	5.54721e-08	1.09949e-06
56945	5.53002	5.57033e-08	1.10284e-06
55666	5.52098	5.57904e-08	1.10333e-06
3614	5.52691	5.63318e-08	1.11279e-06
9890	-5.52018	5.66998e-08	1.11632e-06
10049	5.51833	5.66744e-08	1.11632e-06
153643	-5.51571	5.66607e-08	1.11632e-06
51433	5.51977	5.70477e-08	1.12192e-06
2058	5.51735	5.73563e-08	1.12673e-06
1024	5.51668	5.98475e-08	1.17437e-06
401505	5.51534	6.02329e-08	1.18062e-06
154467	5.5067	6.05219e-08	1.18497e-06
7841	5.50504	6.08136e-08	1.18936e-06
51643	-5.50156	6.11003e-08	1.19365e-06
2766	-5.50558	6.16291e-08	1.20265e-06
1750	5.53741	6.24913e-08	1.2168e-06
8449	5.50287	6.24918e-08	1.2168e-06
1350	-5.49846	6.27229e-08	1.21996e-06
112950	5.50059	6.32229e-08	1.22833e-06
217	-5.50249	6.40536e-08	1.2431e-06
5883	5.49473	6.54523e-08	1.26886e-06
388743	-5.49371	6.57515e-08	1.27326e-06
9143	5.5002	6.64599e-08	1.28557e-06
85460	5.49115	6.6778e-08	1.29031e-06
81570	5.49124	6.72112e-08	1.29726e-06
57410	5.48446	6.79078e-08	1.30871e-06
9793	5.49421	6.79521e-08	1.30871e-06
26284	5.48346	6.83275e-08	1.31451e-06
10199	5.48591	6.85827e-08	1.31703e-06
8850	-5.48283	6.86076e-08	1.31703e-06
92312	5.48746	6.89069e-08	1.32134e-06
959	-5.47656	6.98508e-08	1.33779e-06
51608	5.48505	6.99161e-08	1.33779e-06
157570	5.48535	7.10118e-08	1.35728e-06
11095	-5.47297	7.13322e-08	1.36194e-06
221833	5.50056	7.25228e-08	1.38251e-06
79370	-5.47079	7.25663e-08	1.38251e-06
10617	5.47448	7.27478e-08	1.38448e-06
8857	-5.46837	7.35913e-08	1.39903e-06
64403	5.47404	7.38438e-08	1.4021e-06
54901	5.47843	7.39117e-08	1.4021e-06
219988	5.47928	7.41579e-08	1.40527e-06
29088	5.47136	7.44365e-08	1.40709e-06
10650	5.47392	7.44929e-08	1.40709e-06
54414	-5.46846	7.43365e-08	1.40709e-06
26259	5.46682	7.52332e-08	1.41956e-06
401546	-5.46706	7.66053e-08	1.4439e-06
90522	5.4619	7.74016e-08	1.45736e-06
200504	-5.45706	7.75713e-08	1.459e-06
10113	5.46189	7.77658e-08	1.4611e-06
60672	5.45405	7.87833e-08	1.47865e-06
1786	5.45884	7.91621e-08	1.48418e-06
8480	5.45721	7.99821e-08	1.49638e-06
83896	5.53202	7.99323e-08	1.49638e-06
51435	-5.45184	8.02942e-08	1.50064e-06
55967	5.45167	8.07716e-08	1.50656e-06
10484	5.45485	8.07814e-08	1.50656e-06
3996	5.44981	8.10241e-08	1.50949e-06
55176	5.45385	8.1518e-08	1.51709e-06
387263	5.45393	8.18854e-08	1.52233e-06
10376	5.45567	8.20307e-08	1.52343e-06
8087	5.44993	8.38622e-08	1.55581e-06
55503	-5.44157	8.55098e-08	1.58471e-06
9238	5.43974	8.58936e-08	1.59016e-06
84152	-5.4398	8.62922e-08	1.59586e-06
155465	-5.44225	8.65294e-08	1.59691e-06
401258	-5.44855	8.64642e-08	1.59691e-06
10940	5.44172	8.7157e-08	1.60573e-06
205564	5.44547	8.72144e-08	1.60573e-06
5692	5.43948	8.72799e-08	1.60573e-06
3276	5.43887	8.73847e-08	1.60599e-06
28511	5.43972	8.76017e-08	1.6083e-06
80028	5.43973	8.77814e-08	1.60993e-06
152185	5.43695	8.9445e-08	1.63874e-06
8550	5.43455	9.00586e-08	1.64828e-06
90417	5.43023	9.28749e-08	1.69806e-06
57396	-5.42249	9.33401e-08	1.70481e-06
2206	-5.42109	9.36841e-08	1.70865e-06
9185	-5.42101	9.37436e-08	1.70865e-06
10248	5.42582	9.45624e-08	1.7218e-06
23708	-5.42388	9.50572e-08	1.72902e-06
3248	-5.41504	9.70847e-08	1.76409e-06
441272	5.42463	9.74618e-08	1.76912e-06
51090	-5.41301	9.83128e-08	1.78274e-06
10595	-5.41126	9.88757e-08	1.79111e-06
2662	-5.41068	9.99913e-08	1.80946e-06
25988	5.41526	1.00684e-07	1.82014e-06
729	-5.40826	1.02998e-07	1.86006e-06
5163	5.41185	1.03988e-07	1.87602e-06
163589	5.43382	1.04423e-07	1.88196e-06
29901	5.40075	1.05464e-07	1.89879e-06
6905	5.40199	1.06131e-07	1.90885e-06
124808	5.3986	1.0634e-07	1.91066e-06
55304	-5.40402	1.06953e-07	1.91972e-06
4898	5.40293	1.07629e-07	1.9299e-06
8309	-5.39715	1.08762e-07	1.94824e-06
23532	5.40575	1.08989e-07	1.95033e-06
10574	5.39238	1.10259e-07	1.97105e-06
25940	5.38873	1.13572e-07	2.02824e-06
64858	5.38773	1.13691e-07	2.02831e-06
10623	5.38518	1.15851e-07	2.06455e-06
165324	5.39097	1.15956e-07	2.06455e-06
4291	5.3841	1.16102e-07	2.06507e-06
9912	-5.37995	1.19573e-07	2.12468e-06
5885	5.37686	1.22554e-07	2.17546e-06
55920	5.37581	1.22963e-07	2.18053e-06
255027	-5.368	1.23795e-07	2.19309e-06
56941	5.37625	1.23975e-07	2.19408e-06
388531	5.39717	1.24397e-07	2.19934e-06
367	-5.36659	1.24746e-07	2.2033e-06
1662	5.37098	1.2534e-07	2.20939e-06
23065	5.37039	1.25218e-07	2.20939e-06
84900	5.37747	1.25706e-07	2.21364e-06
9075	-5.36376	1.26606e-07	2.22725e-06
23741	-5.36674	1.27002e-07	2.232e-06
53905	-5.36287	1.2725e-07	2.23414e-06
8228	-5.36857	1.27698e-07	2.23757e-06
157310	-5.36226	1.27583e-07	2.23757e-06
23141	5.36672	1.28477e-07	2.24899e-06
374393	5.36634	1.29002e-07	2.25594e-06
27430	-5.36324	1.29969e-07	2.2706e-06
56	5.37488	1.31858e-07	2.29756e-06
8500	5.36669	1.31769e-07	2.29756e-06
2184	-5.35764	1.31902e-07	2.29756e-06
10388	5.38876	1.32647e-07	2.30826e-06
835	5.35699	1.33863e-07	2.32714e-06
8541	5.37003	1.34969e-07	2.34406e-06
2894	-5.34998	1.36246e-07	2.35957e-06
55585	5.35571	1.36263e-07	2.35957e-06
84108	5.36214	1.36053e-07	2.35957e-06
8492	-5.34742	1.38591e-07	2.39755e-06
64946	5.35033	1.39684e-07	2.41409e-06
10951	5.34518	1.41299e-07	2.43961e-06
6857	5.36152	1.42612e-07	2.45988e-06
199953	5.3439	1.428e-07	2.46073e-06
388561	5.35027	1.43344e-07	2.4677e-06
6117	5.35216	1.44884e-07	2.49177e-06
116039	5.34427	1.465e-07	2.51713e-06
84239	-5.33764	1.47185e-07	2.52644e-06
10056	5.34168	1.47597e-07	2.52961e-06
9819	5.34636	1.47656e-07	2.52961e-06
119032	-5.33603	1.47873e-07	2.53088e-06
253558	5.3396	1.4978e-07	2.56103e-06
56729	-5.33116	1.49978e-07	2.56195e-06
81929	5.33943	1.50959e-07	2.57622e-06
10465	5.33822	1.52249e-07	2.59572e-06
10172	5.3343	1.52646e-07	2.59999e-06
55770	5.33503	1.54407e-07	2.62744e-06
7965	5.32517	1.58643e-07	2.69433e-06
2068	5.32629	1.58512e-07	2.69433e-06
56898	-5.32117	1.58801e-07	2.69443e-06
388931	5.34513	1.59219e-07	2.69893e-06
221527	5.31903	1.61243e-07	2.73064e-06
10890	5.32341	1.61906e-07	2.73923e-06
84561	5.31807	1.62323e-07	2.74366e-06
10213	5.31561	1.66034e-07	2.80324e-06
54919	5.31779	1.66165e-07	2.80324e-06
10382	5.3439	1.66561e-07	2.80725e-06
285753	5.32012	1.68385e-07	2.83528e-06
256227	5.34063	1.70067e-07	2.86089e-06
116461	5.31287	1.7036e-07	2.86308e-06
10090	-5.30715	1.714e-07	2.8758e-06
55743	5.30787	1.71442e-07	2.8758e-06
8872	5.30409	1.77426e-07	2.97335e-06
256691	-5.29801	1.78811e-07	2.99373e-06
24141	-5.29548	1.80495e-07	3.01906e-06
7004	5.30004	1.80793e-07	3.02118e-06
1408	-5.29442	1.81511e-07	3.03033e-06
23028	5.30246	1.82393e-07	3.04217e-06
6338	-5.29406	1.84192e-07	3.06929e-06
80222	5.29712	1.84658e-07	3.07127e-06
27246	5.29318	1.84658e-07	3.07127e-06
6323	-5.29405	1.849e-07	3.07239e-06
1102	-5.29051	1.85329e-07	3.07663e-06
3899	-5.29004	1.85694e-07	3.07981e-06
51400	5.30156	1.87326e-07	3.10396e-06
399909	5.28862	1.88773e-07	3.12501e-06
83756	5.30339	1.89559e-07	3.13509e-06
283212	5.30578	1.9051e-07	3.14787e-06
8836	5.29609	1.90976e-07	3.15222e-06
368	-5.28589	1.9113e-07	3.15222e-06
402573	5.31184	1.91332e-07	3.15261e-06
51122	5.29903	1.91779e-07	3.15704e-06
79815	-5.29056	1.9307e-07	3.17328e-06
8540	5.28999	1.93125e-07	3.17328e-06
22820	5.28669	1.94311e-07	3.1898e-06
60561	5.28833	1.96089e-07	3.21601e-06
55833	5.28622	1.97858e-07	3.242e-06
147741	5.32692	1.99795e-07	3.27071e-06
3840	5.28121	2.05069e-07	3.35363e-06
7049	-5.27105	2.05239e-07	3.35363e-06
79183	5.2752	2.07161e-07	3.3819e-06
83478	-5.27044	2.07653e-07	3.38509e-06
51096	5.27445	2.07739e-07	3.38509e-06
440145	5.28198	2.08311e-07	3.39129e-06
54881	5.26907	2.1157e-07	3.44117e-06
23225	5.27407	2.1248e-07	3.4528e-06
10038	5.27033	2.14181e-07	3.47724e-06
1910	-5.2609	2.15731e-07	3.49598e-06
3654	5.26212	2.15625e-07	3.49598e-06
54663	5.26263	2.18377e-07	3.53563e-06
11270	5.2656	2.19524e-07	3.55095e-06
2273	-5.25757	2.19743e-07	3.55124e-06
28976	5.2676	2.24055e-07	3.61762e-06
3574	-5.25405	2.24498e-07	3.62146e-06
200424	5.25831	2.28108e-07	3.673e-06
23054	5.25697	2.27971e-07	3.673e-06
128229	5.25456	2.31204e-07	3.71947e-06
6626	5.24908	2.33119e-07	3.74553e-06
339230	5.24748	2.33248e-07	3.74553e-06
84243	5.24851	2.33783e-07	3.75071e-06
9711	5.25504	2.34802e-07	3.76214e-06
55831	-5.25244	2.3496e-07	3.76214e-06
55177	-5.24441	2.35134e-07	3.76214e-06
84285	5.24869	2.37184e-07	3.79151e-06
30815	-5.2434	2.37713e-07	3.79654e-06
4105	5.26205	2.38949e-07	3.81283e-06
9236	-5.2429	2.39345e-07	3.81571e-06
257160	5.25427	2.40135e-07	3.82486e-06
80736	-5.24319	2.42674e-07	3.86181e-06
9801	5.23842	2.4367e-07	3.87417e-06
25920	5.24194	2.44086e-07	3.8773e-06
3836	5.24985	2.44855e-07	3.88603e-06
2906	5.25267	2.46411e-07	3.90721e-06
84417	-5.23761	2.46793e-07	3.90976e-06
3198	5.26668	2.47291e-07	3.9111e-06
51069	5.24243	2.4732e-07	3.9111e-06
10391	-5.23542	2.4785e-07	3.91249e-06
10788	-5.23401	2.47767e-07	3.91249e-06
64105	5.23942	2.48716e-07	3.92266e-06
9215	-5.23855	2.49017e-07	3.92391e-06
26747	5.23614	2.49292e-07	3.92473e-06
9654	5.24138	2.50038e-07	3.93297e-06
8671	-5.23282	2.54432e-07	3.99854e-06
10381	5.23424	2.54826e-07	4.00118e-06
6098	-5.2299	2.56132e-07	4.01811e-06
5169	-5.22641	2.57666e-07	4.03859e-06
3131	-5.22665	2.59294e-07	4.05692e-06
10439	-5.2286	2.5911e-07	4.05692e-06
8970	5.23585	2.64965e-07	4.14199e-06
85465	5.22102	2.68506e-07	4.18993e-06
7916	5.22304	2.68395e-07	4.18993e-06
203245	5.22675	2.72195e-07	4.24375e-06
56674	-5.21707	2.73873e-07	4.25699e-06
4172	5.22411	2.73723e-07	4.25699e-06
347240	5.22512	2.73813e-07	4.25699e-06
54977	-5.21727	2.74008e-07	4.25699e-06
7627	5.21536	2.77156e-07	4.30212e-06
55100	5.22974	2.77955e-07	4.30924e-06
219621	-5.21222	2.78102e-07	4.30924e-06
8218	5.23183	2.79438e-07	4.32615e-06
3476	-5.21225	2.8231e-07	4.36679e-06
705	5.20676	2.85363e-07	4.41016e-06
84002	5.21107	2.89746e-07	4.47399e-06
79991	-5.20693	2.91323e-07	4.49441e-06
397	-5.20722	2.93802e-07	4.5287e-06
3108	-5.20392	2.95352e-07	4.54863e-06
51751	-5.19528	3.01973e-07	4.64655e-06
166336	-5.19512	3.03722e-07	4.6694e-06
54971	5.19623	3.05319e-07	4.68987e-06
57561	-5.19498	3.06172e-07	4.69889e-06
4800	5.1983	3.08934e-07	4.73717e-06
11011	5.19421	3.10033e-07	4.74989e-06
2967	5.19426	3.10883e-07	4.75879e-06
10609	5.18798	3.18962e-07	4.87825e-06
3015	5.18656	3.22598e-07	4.92959e-06
150946	5.19243	3.23369e-07	4.9371e-06
54906	5.18625	3.24602e-07	4.95165e-06
8991	-5.1855	3.2564e-07	4.96321e-06
3376	5.17983	3.28596e-07	5.00395e-06
55037	5.18133	3.31225e-07	5.0353e-06
5704	5.18278	3.3102e-07	5.0353e-06
4135	-5.17354	3.37059e-07	5.11671e-06
7204	5.18202	3.37159e-07	5.11671e-06
57333	5.17629	3.39457e-07	5.14716e-06
1029	5.18082	3.39849e-07	5.14871e-06
3038	-5.17581	3.4141e-07	5.16791e-06
23394	5.17304	3.41997e-07	5.17238e-06
23	5.17498	3.43624e-07	5.19254e-06
33	-5.16217	3.5786e-07	5.40305e-06
9343	5.16244	3.60537e-07	5.43881e-06
126129	5.19248	3.6179e-07	5.45306e-06
54442	5.17105	3.62294e-07	5.45602e-06
84246	5.17009	3.64416e-07	5.47863e-06
83932	5.16181	3.64202e-07	5.47863e-06
399664	5.16029	3.65213e-07	5.48595e-06
80741	-5.15827	3.66739e-07	5.5042e-06
7705	5.15965	3.68135e-07	5.52046e-06
84869	-5.15963	3.73597e-07	5.59762e-06
6199	5.1556	3.75039e-07	5.61149e-06
202309	-5.15265	3.75158e-07	5.61149e-06
22979	5.17075	3.76659e-07	5.62919e-06
181	-5.15211	3.77338e-07	5.63458e-06
6164	-5.15134	3.82353e-07	5.70464e-06
79935	5.15625	3.82743e-07	5.70565e-06
55907	5.16276	3.83878e-07	5.71293e-06
26528	5.14876	3.83826e-07	5.71293e-06
2773	5.14916	3.84742e-07	5.71617e-06
2934	-5.1483	3.84669e-07	5.71617e-06
8161	5.14612	3.89946e-07	5.78862e-06
80108	-5.14508	3.92973e-07	5.82865e-06
340706	-5.14927	3.93664e-07	5.83402e-06
55669	5.14972	3.94446e-07	5.84071e-06
6441	-5.14368	3.95327e-07	5.84644e-06
6764	-5.14404	3.95495e-07	5.84644e-06
2122	-5.14557	3.95966e-07	5.84852e-06
83592	5.14901	4.00399e-07	5.90907e-06
10683	5.16306	4.02766e-07	5.93409e-06
55135	5.1451	4.02511e-07	5.93409e-06
113802	5.14565	4.03704e-07	5.94296e-06
148213	5.16029	4.04218e-07	5.94556e-06
9757	5.13902	4.05629e-07	5.96136e-06
92609	5.14845	4.06106e-07	5.96341e-06
30968	5.14294	4.07838e-07	5.98388e-06
722	-5.13773	4.0953e-07	6.00372e-06
57348	5.1774	4.1156e-07	6.02849e-06
7884	5.14395	4.13366e-07	6.04992e-06
6482	-5.13619	4.14344e-07	6.05923e-06
2735	-5.13608	4.157e-07	6.07403e-06
51026	5.14028	4.18367e-07	6.10795e-06
2873	5.12881	4.22561e-07	6.16409e-06
93649	-5.12951	4.24398e-07	6.18579e-06
51107	5.13799	4.24813e-07	6.18673e-06
11124	5.1342	4.28081e-07	6.2292e-06
1155	5.13767	4.3081e-07	6.26272e-06
5602	-5.12551	4.31093e-07	6.26272e-06
6499	5.12473	4.34277e-07	6.30379e-06
100271715	5.1605	4.38907e-07	6.36577e-06
22994	5.12298	4.3969e-07	6.3719e-06
11063	5.16351	4.42628e-07	6.40923e-06
10399	-5.1211	4.44399e-07	6.4296e-06
2040	-5.12015	4.46126e-07	6.44932e-06
81572	5.12443	4.47399e-07	6.45976e-06
51629	5.11772	4.4758e-07	6.45976e-06
55282	-5.1234	4.48393e-07	6.46623e-06
229	-5.13284	4.49154e-07	6.47192e-06
3170	-5.12391	4.52108e-07	6.50918e-06
388135	-5.11644	4.53159e-07	6.519e-06
64116	-5.11436	4.55463e-07	6.54682e-06
54959	-5.12148	4.63863e-07	6.6576e-06
50506	-5.13345	4.63923e-07	6.6576e-06
9328	5.11911	4.6596e-07	6.6814e-06
8893	5.11865	4.69119e-07	6.72125e-06
10581	-5.12123	4.76361e-07	6.81948e-06
55094	5.11261	4.77585e-07	6.83147e-06
64283	-5.10717	4.78179e-07	6.83444e-06
150223	5.11013	4.79767e-07	6.8516e-06
55345	5.1138	4.81359e-07	6.86878e-06
116285	-5.10134	4.85445e-07	6.91948e-06
120103	5.12145	4.85694e-07	6.91948e-06
221303	-5.10039	4.87442e-07	6.9332e-06
51361	5.10488	4.87353e-07	6.9332e-06
11267	5.10229	4.89231e-07	6.95306e-06
5585	5.10403	4.89714e-07	6.95433e-06
51726	5.10766	4.93449e-07	7.00175e-06
9816	5.09993	4.95593e-07	7.02653e-06
56888	5.09888	4.97915e-07	7.03318e-06
1153	-5.1031	4.96797e-07	7.03318e-06
55192	-5.09767	4.98051e-07	7.03318e-06
10280	5.10446	4.97756e-07	7.03318e-06
117156	-5.09776	4.97011e-07	7.03318e-06
100820829	-5.09811	4.99296e-07	7.03391e-06
5507	-5.09714	4.99002e-07	7.03391e-06
55286	-5.09705	4.98984e-07	7.03391e-06
55379	5.09473	5.01627e-07	7.06113e-06
55854	5.09968	5.02602e-07	7.06921e-06
5810	5.10157	5.04976e-07	7.09696e-06
1876	5.10304	5.06848e-07	7.11762e-06
528	5.09303	5.15797e-07	7.23753e-06
58490	5.09113	5.16878e-07	7.24695e-06
3008	5.09455	5.18956e-07	7.27031e-06
348995	5.09155	5.22584e-07	7.31535e-06
60560	5.08975	5.2888e-07	7.39762e-06
6874	5.08359	5.3114e-07	7.42336e-06
55636	5.09339	5.36788e-07	7.49638e-06
10096	5.08544	5.38978e-07	7.52102e-06
80070	5.13809	5.42391e-07	7.55672e-06
10856	5.08243	5.42124e-07	7.55672e-06
27094	5.08528	5.47013e-07	7.61337e-06
317649	-5.0838	5.47319e-07	7.61337e-06
51602	5.07902	5.49567e-07	7.63864e-06
23210	5.07911	5.52483e-07	7.67313e-06
27127	5.09453	5.54659e-07	7.69731e-06
689	-5.07583	5.5632e-07	7.7143e-06
2683	5.07582	5.65622e-07	7.83714e-06
55149	5.07192	5.66728e-07	7.84632e-06
55632	5.088	5.70567e-07	7.88712e-06
51267	-5.06959	5.70267e-07	7.88712e-06
253260	5.07911	5.78452e-07	7.98986e-06
144404	5.06667	5.84387e-07	8.05696e-06
476	-5.06573	5.84513e-07	8.05696e-06
7165	5.06951	5.84676e-07	8.05696e-06
7532	5.06526	5.85195e-07	8.05783e-06
4097	5.07424	5.86443e-07	8.06873e-06
10055	5.07316	5.88609e-07	8.09223e-06
26000	5.06543	5.97373e-07	8.20633e-06
285671	-5.06043	5.98762e-07	8.21903e-06
9443	-5.06105	6.03852e-07	8.28247e-06
8898	5.06303	6.06201e-07	8.30824e-06
8399	-5.05627	6.09182e-07	8.34264e-06
8190	-5.09778	6.12791e-07	8.38556e-06
60481	5.06007	6.17923e-07	8.44925e-06
55195	-5.06031	6.18651e-07	8.45267e-06
9129	5.05414	6.23331e-07	8.51004e-06
65083	5.05172	6.25103e-07	8.51516e-06
23214	5.05846	6.25116e-07	8.51516e-06
84542	5.05584	6.25151e-07	8.51516e-06
10971	5.05426	6.32585e-07	8.60315e-06
338707	5.05715	6.32415e-07	8.60315e-06
3054	5.05101	6.36001e-07	8.64296e-06
29886	5.05071	6.41622e-07	8.71266e-06
55676	5.04677	6.42884e-07	8.72309e-06
81034	5.05088	6.43753e-07	8.72818e-06
27086	-5.05603	6.49719e-07	8.79251e-06
84798	5.04425	6.49989e-07	8.79251e-06
153364	-5.04447	6.4976e-07	8.79251e-06
9869	5.05383	6.51262e-07	8.80299e-06
11333	5.04332	6.5462e-07	8.84161e-06
653519	5.04479	6.57114e-07	8.86853e-06
6632	5.04453	6.60327e-07	8.90251e-06
51174	5.0433	6.60639e-07	8.90251e-06
22847	5.0412	6.69703e-07	9.01778e-06
51259	5.03999	6.70663e-07	9.02181e-06
8884	5.04128	6.71023e-07	9.02181e-06
7469	5.0387	6.80235e-07	9.1257e-06
2636	5.10193	6.80298e-07	9.1257e-06
85021	5.03615	6.79388e-07	9.1257e-06
261726	5.03503	6.81002e-07	9.12821e-06
23251	5.05125	6.82036e-07	9.13514e-06
10919	5.03381	6.84294e-07	9.15845e-06
84792	5.03263	6.89886e-07	9.22632e-06
23623	5.03357	6.95095e-07	9.28895e-06
56919	5.03599	7.01333e-07	9.36523e-06
8570	5.03498	7.03144e-07	9.38233e-06
9040	5.03501	7.03728e-07	9.38304e-06
2091	5.03527	7.05175e-07	9.39525e-06
201799	-5.029	7.08848e-07	9.43707e-06
93081	5.03371	7.09666e-07	9.44085e-06
340393	5.05214	7.10862e-07	9.44966e-06
347252	5.03202	7.33026e-07	9.73696e-06
25963	-5.02032	7.33874e-07	9.74091e-06
23076	5.0231	7.38107e-07	9.78975e-06
2664	5.02689	7.38931e-07	9.79333e-06
55236	5.0248	7.41491e-07	9.81989e-06
208	5.01722	7.48707e-07	9.90804e-06
2294	-5.01396	7.49581e-07	9.91219e-06
83938	-5.01621	7.50428e-07	9.91597e-06
11104	5.01662	7.52816e-07	9.94009e-06
57222	-5.01634	7.53554e-07	9.94241e-06
4957	5.01695	7.59179e-07	1.00092e-05
56654	-5.01136	7.63757e-07	1.0062e-05
3959	-5.02964	7.64392e-07	1.00629e-05
10564	5.01166	7.65077e-07	1.00644e-05
6500	-5.00933	7.70728e-07	1.01312e-05
1054	5.01765	7.72568e-07	1.01479e-05
3945	5.00781	7.75406e-07	1.01776e-05
5531	5.01555	7.76106e-07	1.01792e-05
57615	5.04843	7.819e-07	1.02476e-05
284340	-5.01915	7.84823e-07	1.02709e-05
1122	5.00774	7.84838e-07	1.02709e-05
84775	5.0094	7.95909e-07	1.0408e-05
387521	5.00061	8.06644e-07	1.05406e-05
23379	5.00446	8.099e-07	1.05676e-05
401548	-4.99863	8.09446e-07	1.05676e-05
112770	5.00318	8.10742e-07	1.05707e-05
7123	-4.99666	8.16646e-07	1.06399e-05
3948	5.00836	8.229e-07	1.07056e-05
348235	4.99597	8.22421e-07	1.07056e-05
10129	-4.99486	8.36681e-07	1.08769e-05
83889	5.05704	8.38479e-07	1.08922e-05
26022	-4.99582	8.39733e-07	1.09005e-05
58491	5.0006	8.41338e-07	1.09133e-05
10884	4.99949	8.45932e-07	1.09649e-05
2071	4.99231	8.49559e-07	1.10038e-05
6038	-4.98791	8.53984e-07	1.1053e-05
51249	4.9972	8.56511e-07	1.10695e-05
7156	4.99546	8.56431e-07	1.10695e-05
51497	4.99104	8.58044e-07	1.10812e-05
26112	-4.98574	8.62322e-07	1.11284e-05
6361	-4.98485	8.65284e-07	1.11584e-05
57763	-4.98546	8.66359e-07	1.11642e-05
80129	-4.98415	8.68874e-07	1.11884e-05
79685	-4.98766	8.70353e-07	1.11933e-05
3837	4.98427	8.70517e-07	1.11933e-05
10432	4.98546	8.73668e-07	1.12256e-05
56893	4.9838	8.74857e-07	1.12327e-05
23020	4.98731	8.75859e-07	1.12374e-05
10153	4.98388	8.84566e-07	1.13409e-05
10298	4.98588	8.8819e-07	1.13791e-05
8470	-4.98143	8.98116e-07	1.1498e-05
3033	-4.97806	9.03421e-07	1.15575e-05
79596	4.98462	9.07514e-07	1.16015e-05
24145	4.9749	9.1787e-07	1.17254e-05
5348	-4.97658	9.2664e-07	1.18237e-05
84131	4.98713	9.26903e-07	1.18237e-05
55349	-4.97313	9.2944e-07	1.18475e-05
348327	4.97374	9.32633e-07	1.18797e-05
57592	4.97523	9.37124e-07	1.19283e-05
25853	4.97257	9.46526e-07	1.20349e-05
79825	-4.96676	9.46866e-07	1.20349e-05
9690	4.97201	9.48652e-07	1.20403e-05
4591	4.96687	9.48475e-07	1.20403e-05
1676	4.97464	9.49554e-07	1.20431e-05
9650	4.96944	9.50648e-07	1.20484e-05
6832	4.96804	9.51457e-07	1.205e-05
2272	-4.96656	9.53457e-07	1.20667e-05
81035	-4.96569	9.58402e-07	1.21119e-05
3992	4.97073	9.57858e-07	1.21119e-05
1737	4.97109	9.60485e-07	1.21295e-05
847	-4.96545	9.63214e-07	1.21553e-05
8882	4.97048	9.69059e-07	1.22117e-05
23435	4.96432	9.68881e-07	1.22117e-05
88745	4.9638	9.80148e-07	1.23426e-05
7100	-4.96565	9.83101e-07	1.2371e-05
477	-4.96073	9.83861e-07	1.23717e-05
9277	4.95893	9.94573e-07	1.24975e-05
65244	4.96254	1.00872e-06	1.26608e-05
124842	-4.954	1.009e-06	1.26608e-05
148137	4.95691	1.01429e-06	1.27181e-05
55733	-4.95848	1.01997e-06	1.27804e-05
4306	-4.95833	1.02318e-06	1.28115e-05
55726	4.95802	1.02675e-06	1.2847e-05
64800	-4.95176	1.02937e-06	1.28617e-05
9909	4.95611	1.029e-06	1.28617e-05
339175	4.95029	1.03133e-06	1.28771e-05
1371	4.95428	1.04644e-06	1.30566e-05
27161	4.94942	1.05418e-06	1.31345e-05
11077	4.9591	1.05395e-06	1.31345e-05
55109	-4.94796	1.06157e-06	1.32173e-05
123228	-4.94489	1.06254e-06	1.322e-05
10362	4.94451	1.07569e-06	1.33648e-05
9825	4.9424	1.07538e-06	1.33648e-05
122618	-4.94029	1.08256e-06	1.34408e-05
647087	4.9457	1.08535e-06	1.3466e-05
91947	-4.93996	1.08773e-06	1.3486e-05
8904	4.93888	1.08872e-06	1.34888e-05
972	-4.93921	1.10514e-06	1.36827e-05
5727	-4.93386	1.11069e-06	1.37367e-05
7036	4.94577	1.11106e-06	1.37367e-05
471	4.93441	1.11694e-06	1.37963e-05
11091	4.9389	1.11744e-06	1.37963e-05
10216	-4.9321	1.12594e-06	1.38915e-05
6642	-4.93182	1.13073e-06	1.39409e-05
54840	4.93586	1.13235e-06	1.39512e-05
51155	4.92852	1.14512e-06	1.40986e-05
753	-4.92807	1.14898e-06	1.41364e-05
3181	4.9281	1.15018e-06	1.41413e-05
339448	4.92674	1.15742e-06	1.42204e-05
9768	4.92903	1.1637e-06	1.42877e-05
23139	4.93041	1.16563e-06	1.43014e-05
2178	4.93231	1.16673e-06	1.4305e-05
148479	4.92498	1.16964e-06	1.43307e-05
6584	-4.92923	1.17717e-06	1.4403e-05
51378	-4.94622	1.17711e-06	1.4403e-05
1653	4.93477	1.18054e-06	1.44343e-05
120425	-4.92196	1.1831e-06	1.44556e-05
64078	-4.92066	1.18578e-06	1.44724e-05
7259	-4.92289	1.18611e-06	1.44724e-05
9665	-4.92064	1.1937e-06	1.4555e-05
6785	4.9376	1.20196e-06	1.46354e-05
84057	4.92058	1.20133e-06	1.46354e-05
84186	4.92984	1.20561e-06	1.46697e-05
6636	4.92034	1.20773e-06	1.46855e-05
8985	4.91893	1.21076e-06	1.47122e-05
80263	4.92316	1.21231e-06	1.47209e-05
6627	4.91689	1.22135e-06	1.48103e-05
6439	-4.91992	1.22081e-06	1.48103e-05
2288	4.91782	1.22223e-06	1.48109e-05
7178	-4.91429	1.2335e-06	1.49269e-05
8936	4.91601	1.23291e-06	1.49269e-05
4150	4.91535	1.23801e-06	1.49712e-05
158511	4.93011	1.24528e-06	1.50386e-05
165829	4.9408	1.24486e-06	1.50386e-05
121441	4.9146	1.25363e-06	1.51291e-05
10989	4.91407	1.25543e-06	1.51405e-05
79959	4.92038	1.25683e-06	1.5147e-05
80142	4.90856	1.25893e-06	1.51517e-05
27158	4.91099	1.25822e-06	1.51517e-05
79572	4.91523	1.26395e-06	1.52018e-05
747	4.9099	1.27147e-06	1.52818e-05
729238	-4.90829	1.2804e-06	1.53774e-05
1716	4.91152	1.28116e-06	1.53774e-05
9425	4.90812	1.2876e-06	1.54442e-05
4111	4.92287	1.29111e-06	1.54758e-05
146894	-4.91509	1.29732e-06	1.55398e-05
10980	4.90882	1.3008e-06	1.55708e-05
118442	4.94328	1.30484e-06	1.56087e-05
7411	4.90833	1.30809e-06	1.5637e-05
2826	4.92769	1.31818e-06	1.57469e-05
135458	4.91386	1.32341e-06	1.57987e-05
79872	4.90699	1.32902e-06	1.5855e-05
4528	4.8962	1.33926e-06	1.59341e-05
9874	4.90054	1.33674e-06	1.59341e-05
27022	4.91962	1.33833e-06	1.59341e-05
80135	4.89851	1.33874e-06	1.59341e-05
8880	4.90226	1.34684e-06	1.60136e-05
6729	4.89926	1.34779e-06	1.60141e-05
9917	4.89838	1.35572e-06	1.60975e-05
285636	4.90082	1.36345e-06	1.61751e-05
11165	4.90228	1.36408e-06	1.61751e-05
9942	4.89676	1.36791e-06	1.61986e-05
9790	4.89509	1.36708e-06	1.61986e-05
27097	4.89242	1.37155e-06	1.62309e-05
5870	4.89804	1.37656e-06	1.62793e-05
2304	4.90989	1.38233e-06	1.63366e-05
84189	-4.88565	1.40438e-06	1.65861e-05
5783	-4.8872	1.41234e-06	1.6669e-05
3002	4.88716	1.41544e-06	1.66945e-05
80209	4.8899	1.4182e-06	1.67158e-05
155061	4.89287	1.42449e-06	1.67788e-05
92906	4.88782	1.43015e-06	1.68343e-05
65267	4.90168	1.45263e-06	1.70874e-05
55234	4.88628	1.45419e-06	1.70944e-05
9685	-4.88449	1.46741e-06	1.72384e-05
255189	-4.87618	1.46966e-06	1.72534e-05
6095	-4.8763	1.47701e-06	1.73281e-05
9733	4.87671	1.4919e-06	1.74912e-05
7097	-4.87438	1.49491e-06	1.7515e-05
52	4.87976	1.50052e-06	1.7569e-05
339983	4.88835	1.5037e-06	1.75946e-05
25909	4.87333	1.50546e-06	1.76035e-05
867	4.88188	1.51498e-06	1.77031e-05
140738	-4.8697	1.51682e-06	1.77129e-05
151525	4.87106	1.54329e-06	1.80101e-05
5295	-4.86815	1.55311e-06	1.81128e-05
400506	4.8654	1.55655e-06	1.81409e-05
55103	4.86843	1.56007e-06	1.817e-05
23531	4.86573	1.5678e-06	1.8248e-05
221895	-4.86485	1.57989e-06	1.83763e-05
4239	-4.86213	1.5809e-06	1.83763e-05
79577	4.86514	1.58391e-06	1.83871e-05
100131390	4.92453	1.58322e-06	1.83871e-05
3304	4.86582	1.5933e-06	1.84839e-05
126731	4.86215	1.60025e-06	1.85524e-05
56650	4.86592	1.61095e-06	1.86643e-05
23640	4.85521	1.64201e-06	1.90116e-05
3075	-4.85416	1.64704e-06	1.90574e-05
3240	-4.85266	1.65103e-06	1.90911e-05
11260	4.85459	1.66623e-06	1.92542e-05
92092	4.85593	1.67054e-06	1.92788e-05
55486	4.85859	1.66948e-06	1.92788e-05
84138	4.85671	1.67218e-06	1.92851e-05
79598	4.85972	1.67536e-06	1.93056e-05
2618	4.85644	1.67614e-06	1.93056e-05
5066	-4.84759	1.70034e-06	1.95717e-05
162282	-4.84475	1.71168e-06	1.96894e-05
388962	4.8471	1.71421e-06	1.97056e-05
3699	-4.84336	1.7224e-06	1.97868e-05
4999	4.84993	1.7292e-06	1.98522e-05
100129543	4.86159	1.73559e-06	1.99126e-05
5002	-4.84447	1.73967e-06	1.99464e-05
92304	-4.83752	1.77014e-06	2.02826e-05
11137	4.83982	1.78529e-06	2.0443e-05
113829	-4.84278	1.78728e-06	2.04525e-05
23492	-4.83496	1.79377e-06	2.05002e-05
11047	4.83484	1.79296e-06	2.05002e-05
102288414	4.8354	1.79867e-06	2.0543e-05
255057	4.83872	1.8017e-06	2.05643e-05
2903	-4.84794	1.80412e-06	2.05786e-05
57761	4.83378	1.81012e-06	2.06338e-05
6468	-4.83517	1.81201e-06	2.0635e-05
7010	-4.83256	1.81256e-06	2.0635e-05
7226	4.83611	1.81525e-06	2.06522e-05
8704	4.83331	1.83441e-06	2.08569e-05
3123	-4.83252	1.84513e-06	2.09647e-05
1361	-4.82919	1.84627e-06	2.09647e-05
653509	-4.83079	1.86254e-06	2.11359e-05
10217	-4.83014	1.87458e-06	2.12589e-05
57089	4.82979	1.87913e-06	2.1294e-05
56647	4.82726	1.88009e-06	2.1294e-05
8815	4.82404	1.89584e-06	2.14587e-05
7289	4.82458	1.9055e-06	2.15464e-05
5499	4.82388	1.90678e-06	2.15464e-05
9457	-4.82247	1.90725e-06	2.15464e-05
22882	-4.82569	1.91916e-06	2.16672e-05
3066	4.82423	1.92498e-06	2.1719e-05
9079	-4.81769	1.94617e-06	2.19441e-05
8515	-4.81715	1.95239e-06	2.19782e-05
162515	-4.81697	1.95293e-06	2.19782e-05
84318	4.82897	1.95134e-06	2.19782e-05
339456	4.82586	1.9748e-06	2.22102e-05
4976	4.8204	1.98081e-06	2.22495e-05
2786	4.82978	1.97956e-06	2.22495e-05
23101	4.84777	1.99777e-06	2.24183e-05
53838	4.8168	1.99838e-06	2.24183e-05
8637	-4.81352	2.00488e-06	2.2477e-05
25962	4.81299	2.01539e-06	2.25806e-05
10140	-4.81254	2.02121e-06	2.26171e-05
1080	-4.80987	2.02033e-06	2.26171e-05
126248	4.82187	2.03185e-06	2.27074e-05
55120	4.81654	2.031e-06	2.27074e-05
7056	-4.80885	2.0371e-06	2.27517e-05
7589	4.81361	2.05127e-06	2.28811e-05
10395	-4.80878	2.05063e-06	2.28811e-05
64785	4.81257	2.06187e-06	2.29848e-05
1164	4.80597	2.07354e-06	2.30985e-05
11044	4.81245	2.07468e-06	2.30985e-05
7177	-4.80411	2.085e-06	2.31988e-05
4023	-4.80508	2.08653e-06	2.32012e-05
9900	4.81807	2.09913e-06	2.33266e-05
147660	4.84156	2.10541e-06	2.33718e-05
6873	4.80469	2.10584e-06	2.33718e-05
80258	-4.80115	2.10848e-06	2.33864e-05
60491	4.80925	2.11716e-06	2.3468e-05
3200	4.81239	2.12692e-06	2.35614e-05
819	-4.79792	2.14277e-06	2.37221e-05
10534	4.7965	2.15323e-06	2.38229e-05
339324	4.7984	2.17179e-06	2.39983e-05
55806	-4.79732	2.17175e-06	2.39983e-05
10426	4.80888	2.1768e-06	2.40386e-05
6403	-4.79347	2.19599e-06	2.42354e-05
150726	4.79649	2.20884e-06	2.4362e-05
5437	4.79539	2.21254e-06	2.43876e-05
6198	4.7921	2.22292e-06	2.44605e-05
5001	4.7991	2.22283e-06	2.44605e-05
221656	4.79395	2.2233e-06	2.44605e-05
254295	-4.79449	2.23101e-06	2.453e-05
79148	-4.78932	2.23349e-06	2.45421e-05
4659	4.79646	2.24948e-06	2.4687e-05
285025	-4.80164	2.24855e-06	2.4687e-05
1072	4.78826	2.25255e-06	2.47054e-05
340419	-4.79112	2.25754e-06	2.47447e-05
55781	-4.78752	2.2633e-06	2.47926e-05
9604	-4.78861	2.27312e-06	2.48847e-05
220359	4.80247	2.27826e-06	2.49101e-05
4798	4.79325	2.27746e-06	2.49101e-05
7064	4.78536	2.28541e-06	2.49728e-05
9148	4.81611	2.29428e-06	2.50542e-05
22880	4.78463	2.30935e-06	2.52032e-05
4163	-4.78207	2.31541e-06	2.52538e-05
375287	-4.7843	2.32087e-06	2.52978e-05
4045	-4.78029	2.32617e-06	2.53243e-05
5414	-4.78036	2.32503e-06	2.53243e-05
57666	4.78176	2.33054e-06	2.53563e-05
11072	4.7788	2.34871e-06	2.55383e-05
2768	4.78211	2.35053e-06	2.55424e-05
55206	4.7844	2.35708e-06	2.55978e-05
85004	-4.77754	2.36345e-06	2.56512e-05
80067	4.78214	2.37274e-06	2.57362e-05
7027	4.79395	2.37437e-06	2.57381e-05
23193	4.78422	2.37887e-06	2.57626e-05
144501	4.77888	2.37955e-06	2.57626e-05
51534	4.77597	2.41073e-06	2.60365e-05
6122	-4.77357	2.40969e-06	2.60365e-05
6670	4.77945	2.41014e-06	2.60365e-05
4774	-4.77624	2.4104e-06	2.60365e-05
2011	4.77832	2.43385e-06	2.62701e-05
10245	4.77587	2.44017e-06	2.63223e-05
2277	-4.76888	2.45644e-06	2.64816e-05
22929	4.77379	2.45933e-06	2.64966e-05
8535	4.77251	2.47535e-06	2.6653e-05
10005	4.76848	2.48582e-06	2.67494e-05
390916	4.77271	2.48929e-06	2.67705e-05
10960	-4.7659	2.49614e-06	2.68278e-05
6240	4.7726	2.50137e-06	2.68677e-05
92960	-4.76612	2.50498e-06	2.68738e-05
158866	-4.76589	2.50411e-06	2.68738e-05
139886	4.77213	2.50852e-06	2.68955e-05
1503	4.76872	2.51222e-06	2.69025e-05
10659	-4.76842	2.51177e-06	2.69025e-05
10137	4.76816	2.53002e-06	2.70525e-05
153579	-4.76497	2.53041e-06	2.70525e-05
56915	4.76568	2.53081e-06	2.70525e-05
57524	4.78325	2.53418e-06	2.70721e-05
9699	4.79816	2.54731e-06	2.71959e-05
2931	4.76879	2.56806e-06	2.74009e-05
8890	4.7659	2.57206e-06	2.7427e-05
81831	4.75925	2.5893e-06	2.75942e-05
80155	4.76191	2.59247e-06	2.76114e-05
9245	-4.75746	2.59642e-06	2.76368e-05
54532	-4.75898	2.60532e-06	2.77148e-05
23037	-4.75757	2.61178e-06	2.77518e-05
84934	4.75732	2.61194e-06	2.77518e-05
50651	4.77367	2.61481e-06	2.77657e-05
829	4.75692	2.61742e-06	2.77767e-05
29789	4.75692	2.62791e-06	2.78713e-05
3049	4.7991	2.63522e-06	2.79321e-05
79829	4.75856	2.6381e-06	2.79458e-05
7818	4.75606	2.6511e-06	2.80668e-05
64841	4.75378	2.65372e-06	2.80777e-05
55249	4.75782	2.65612e-06	2.80863e-05
84674	-4.75355	2.66313e-06	2.81267e-05
56990	-4.75567	2.66181e-06	2.81267e-05
65980	4.75794	2.66577e-06	2.81378e-05
25816	-4.75223	2.67946e-06	2.82654e-05
51575	4.75708	2.68628e-06	2.83204e-05
246176	-4.75089	2.69453e-06	2.83906e-05
26168	4.75426	2.71125e-06	2.85496e-05
10406	-4.75205	2.73268e-06	2.87582e-05
54976	4.74751	2.73657e-06	2.8782e-05
1762	4.7447	2.7707e-06	2.91237e-05
401541	4.74541	2.78897e-06	2.92983e-05
2729	4.74862	2.79222e-06	2.93149e-05
5238	4.74853	2.79786e-06	2.93568e-05
160418	4.73979	2.84875e-06	2.9873e-05
5241	-4.73871	2.85315e-06	2.98837e-05
5813	-4.73955	2.85208e-06	2.98837e-05
4174	4.73819	2.86492e-06	2.99892e-05
10389	4.76049	2.87695e-06	3.00879e-05
81931	4.74124	2.87775e-06	3.00879e-05
57335	4.75181	2.88103e-06	3.01043e-05
161198	-4.73521	2.89034e-06	3.01482e-05
7318	-4.74445	2.88886e-06	3.01482e-05
8894	4.73616	2.88811e-06	3.01482e-05
23635	-4.73333	2.92689e-06	3.05115e-05
79813	4.73525	2.93302e-06	3.05573e-05
139716	-4.73062	2.95777e-06	3.0789e-05
148423	4.73194	2.95874e-06	3.0789e-05
11346	-4.72978	2.96865e-06	3.08739e-05
8969	4.737	2.97549e-06	3.09269e-05
23246	4.7286	2.98447e-06	3.1002e-05
51053	4.73066	2.99109e-06	3.10525e-05
5439	4.72971	3.00171e-06	3.11366e-05
26097	4.73127	3.00271e-06	3.11366e-05
9066	4.72514	3.0343e-06	3.14458e-05
10575	4.72807	3.04329e-06	3.15204e-05
5062	4.72771	3.06064e-06	3.16815e-05
9184	4.72902	3.06277e-06	3.1685e-05
2890	-4.72195	3.07498e-06	3.17928e-05
341392	4.75394	3.08271e-06	3.18175e-05
51377	4.72341	3.07967e-06	3.18175e-05
79675	4.728	3.08277e-06	3.18175e-05
57509	-4.72649	3.09246e-06	3.18988e-05
5125	-4.72026	3.10017e-06	3.19598e-05
25852	4.72677	3.11269e-06	3.20701e-05
56259	4.72104	3.11587e-06	3.20842e-05
1967	4.71899	3.12071e-06	3.21154e-05
64426	4.7225	3.12426e-06	3.21331e-05
686	-4.71959	3.15941e-06	3.24758e-05
10651	4.71706	3.16815e-06	3.25467e-05
114898	-4.71113	3.22465e-06	3.31002e-05
6455	4.71133	3.22577e-06	3.31002e-05
84879	-4.71027	3.25505e-06	3.33812e-05
27043	4.71089	3.2754e-06	3.3551e-05
8356	4.72114	3.27379e-06	3.3551e-05
79760	4.71508	3.29015e-06	3.36826e-05
126789	4.70655	3.30227e-06	3.37871e-05
79583	-4.70464	3.3241e-06	3.39908e-05
11273	4.70722	3.33635e-06	3.40964e-05
23371	-4.70325	3.3642e-06	3.43438e-05
80205	-4.70348	3.36445e-06	3.43438e-05
5901	4.70339	3.38345e-06	3.44979e-05
1359	-4.70166	3.38276e-06	3.44979e-05
2327	-4.70028	3.39372e-06	3.45827e-05
55610	4.70853	3.403e-06	3.46572e-05
83657	-4.70085	3.41843e-06	3.47944e-05
23109	4.70429	3.4524e-06	3.51005e-05
140838	4.70334	3.45248e-06	3.51005e-05
2949	-4.69766	3.4599e-06	3.51557e-05
23767	-4.69932	3.47155e-06	3.52538e-05
7534	4.69531	3.48625e-06	3.53828e-05
56052	-4.69565	3.48992e-06	3.53834e-05
55808	-4.70275	3.49031e-06	3.53834e-05
3732	-4.69465	3.4955e-06	3.54158e-05
443	-4.69957	3.50202e-06	3.54615e-05
23090	-4.69725	3.50597e-06	3.54811e-05
4728	4.69275	3.5264e-06	3.56471e-05
7125	4.70716	3.52452e-06	3.56471e-05
9158	4.69555	3.53403e-06	3.56834e-05
150465	4.69703	3.53262e-06	3.56834e-05
152559	4.69618	3.548e-06	3.5804e-05
5715	4.69674	3.55168e-06	3.58207e-05
83752	-4.69281	3.56679e-06	3.59526e-05
116115	4.6957	3.59868e-06	3.62534e-05
2348	-4.68962	3.61474e-06	3.63944e-05
2006	-4.68781	3.61744e-06	3.64009e-05
5756	4.68885	3.6319e-06	3.65256e-05
6166	-4.68829	3.63893e-06	3.65755e-05
1235	-4.68393	3.66624e-06	3.6829e-05
51184	4.68515	3.70857e-06	3.72331e-05
55183	4.6872	3.71798e-06	3.7305e-05
5607	-4.68506	3.71995e-06	3.7305e-05
63898	-4.68132	3.75367e-06	3.76218e-05
2697	-4.67827	3.77959e-06	3.78601e-05
283149	4.68401	3.79313e-06	3.79742e-05
10841	4.71138	3.79982e-06	3.80197e-05
27005	4.67852	3.80213e-06	3.80213e-05
8548	4.67943	3.81492e-06	3.81008e-05
51691	4.68145	3.81304e-06	3.81008e-05
156	4.67796	3.81655e-06	3.81008e-05
6434	4.68271	3.82566e-06	3.81702e-05
3140	-4.67681	3.84033e-06	3.8295e-05
124801	4.67389	3.84956e-06	3.83654e-05
6861	4.71028	3.85287e-06	3.83767e-05
90416	-4.67286	3.85696e-06	3.83959e-05
93166	-4.66883	3.9322e-06	3.91175e-05
25992	-4.66914	3.93387e-06	3.91175e-05
284098	4.66887	3.95598e-06	3.93152e-05
83593	-4.67139	3.97016e-06	3.9434e-05
9702	4.67127	3.97503e-06	3.9438e-05
643699	-4.66641	3.97316e-06	3.9438e-05
56929	-4.66823	3.97997e-06	3.94649e-05
79050	4.66588	3.983e-06	3.94728e-05
23582	-4.66474	4.00491e-06	3.96677e-05
64431	4.67067	4.03645e-06	3.99576e-05
58494	-4.66181	4.06109e-06	4.01791e-05
1615	4.66609	4.07353e-06	4.02797e-05
51663	4.6635	4.07688e-06	4.02903e-05
6120	4.66801	4.11866e-06	4.06804e-05
63935	4.65885	4.1235e-06	4.07054e-05
80000	4.68052	4.13163e-06	4.0763e-05
121642	4.6597	4.15402e-06	4.0961e-05
57181	4.66722	4.17176e-06	4.1113e-05
440	4.65646	4.25052e-06	4.1796e-05
23460	-4.65201	4.24921e-06	4.1796e-05
89927	-4.6521	4.24764e-06	4.1796e-05
113763	4.65826	4.24887e-06	4.1796e-05
26043	4.65693	4.27666e-06	4.20297e-05
7407	4.65047	4.2818e-06	4.20568e-05
730	-4.65207	4.28632e-06	4.20778e-05
8321	-4.65106	4.29041e-06	4.20946e-05
221937	4.65572	4.30603e-06	4.22244e-05
55568	-4.64966	4.32908e-06	4.24269e-05
84893	4.65313	4.33628e-06	4.24739e-05
2329	-4.64913	4.37152e-06	4.27953e-05
7851	-4.64794	4.39518e-06	4.30032e-05
23256	4.64631	4.44997e-06	4.35152e-05
9139	4.652	4.46477e-06	4.36358e-05
5701	4.64572	4.47874e-06	4.37481e-05
84276	-4.64184	4.49044e-06	4.38297e-05
5887	4.64343	4.49205e-06	4.38297e-05
5889	4.64333	4.51298e-06	4.40096e-05
115703	4.64601	4.51591e-06	4.40139e-05
79661	-4.63851	4.53566e-06	4.41577e-05
3192	4.64036	4.53439e-06	4.41577e-05
58533	4.64261	4.53878e-06	4.41638e-05
51301	-4.63569	4.58193e-06	4.45346e-05
399968	4.65414	4.57947e-06	4.45346e-05
7709	4.63611	4.5905e-06	4.45934e-05
84524	4.63875	4.60749e-06	4.47339e-05
392465	-4.63475	4.64096e-06	4.50341e-05
257194	-4.6326	4.64904e-06	4.50877e-05
136319	4.63929	4.66318e-06	4.52002e-05
51438	4.65375	4.70826e-06	4.56121e-05
7753	4.63644	4.73087e-06	4.5806e-05
55064	-4.62865	4.73359e-06	4.58073e-05
10383	4.63012	4.75201e-06	4.59604e-05
1212	-4.62768	4.75539e-06	4.59679e-05
6947	-4.62759	4.76421e-06	4.6028e-05
8153	4.64127	4.7738e-06	4.60955e-05
55151	4.63394	4.80103e-06	4.63331e-05
8295	4.6269	4.82557e-06	4.65191e-05
146862	-4.62692	4.82327e-06	4.65191e-05
29080	4.62848	4.83994e-06	4.66322e-05
7048	-4.6221	4.91737e-06	4.73524e-05
2556	4.63421	4.93083e-06	4.74562e-05
63976	-4.62178	4.94586e-06	4.7575e-05
5425	4.62068	4.97126e-06	4.77933e-05
9913	4.62285	4.981e-06	4.78609e-05
4582	-4.62541	4.98667e-06	4.78893e-05
51559	4.62333	4.99164e-06	4.79111e-05
54584	4.62601	5.00094e-06	4.79743e-05
57545	-4.61629	5.01719e-06	4.81041e-05
91137	-4.61908	5.06057e-06	4.84675e-05
8877	4.6163	5.05828e-06	4.84675e-05
56288	4.61418	5.08123e-06	4.86126e-05
84132	4.61607	5.08035e-06	4.86126e-05
64434	4.61388	5.14191e-06	4.91665e-05
3843	4.61437	5.15553e-06	4.92701e-05
84946	4.61147	5.17736e-06	4.9452e-05
55341	4.61797	5.18459e-06	4.94723e-05
64409	-4.61096	5.18508e-06	4.94723e-05
9118	4.63109	5.19499e-06	4.95401e-05
8315	4.61176	5.21495e-06	4.97037e-05
9586	-4.60768	5.23028e-06	4.98229e-05
6675	4.60967	5.27331e-06	5.02058e-05
84661	4.60931	5.27706e-06	5.02144e-05
10067	4.60666	5.2921e-06	5.03034e-05
51128	-4.60598	5.29208e-06	5.03034e-05
55750	4.60635	5.34724e-06	5.08002e-05
56952	4.60719	5.36542e-06	5.09455e-05
10767	4.60669	5.36917e-06	5.09538e-05
399818	4.60957	5.42147e-06	5.14225e-05
135138	-4.60273	5.43292e-06	5.15035e-05
27233	-4.59932	5.44164e-06	5.15585e-05
9476	-4.60126	5.48466e-06	5.19383e-05
100505876	4.60181	5.51691e-06	5.22157e-05
91057	4.60192	5.5275e-06	5.22879e-05
339745	4.59939	5.54698e-06	5.24442e-05
10645	4.59563	5.55192e-06	5.24628e-05
2307	-4.59394	5.56269e-06	5.25084e-05
55347	4.60071	5.56244e-06	5.25084e-05
4726	4.59427	5.57886e-06	5.2633e-05
90390	4.59846	5.58679e-06	5.26617e-05
64844	4.59806	5.58786e-06	5.26617e-05
8358	4.60365	5.59582e-06	5.27087e-05
10528	4.59356	5.61546e-06	5.28655e-05
93474	4.59872	5.6449e-06	5.31143e-05
51002	4.59256	5.66297e-06	5.3256e-05
9391	4.59617	5.67797e-06	5.33687e-05
80010	4.59393	5.71063e-06	5.36472e-05
3698	-4.59115	5.72493e-06	5.37529e-05
1158	4.6031	5.74736e-06	5.39349e-05
11197	-4.58365	5.82966e-06	5.46782e-05
26003	4.58735	5.84623e-06	5.48045e-05
389677	4.58762	5.8499e-06	5.48099e-05
2821	4.58689	5.86079e-06	5.48828e-05
342892	4.59115	5.90559e-06	5.52731e-05
85480	-4.57971	5.92969e-06	5.54693e-05
3459	-4.58053	5.94125e-06	5.5548e-05
10568	-4.58698	5.96022e-06	5.5696e-05
23107	-4.577	6.06707e-06	5.66644e-05
91151	4.57728	6.0763e-06	5.67207e-05
6788	4.57785	6.08336e-06	5.67567e-05
1660	4.57639	6.08849e-06	5.67746e-05
6478	4.58054	6.09745e-06	5.68281e-05
5805	4.57979	6.11277e-06	5.69353e-05
170850	4.58382	6.1154e-06	5.69353e-05
846	-4.58716	6.11895e-06	5.69384e-05
200010	-4.57502	6.12687e-06	5.69821e-05
63946	4.62487	6.13527e-06	5.70302e-05
9496	-4.57022	6.19376e-06	5.75437e-05
57695	4.57918	6.23395e-06	5.78867e-05
143686	-4.57517	6.24067e-06	5.79187e-05
55773	4.57306	6.25676e-06	5.80375e-05
3703	4.57193	6.28273e-06	5.82478e-05
25855	4.56692	6.29961e-06	5.83738e-05
1562	-4.56643	6.30385e-06	5.83825e-05
6943	-4.56745	6.31145e-06	5.84222e-05
134510	-4.56486	6.35799e-06	5.88222e-05
202018	-4.56654	6.37378e-06	5.89374e-05
3775	-4.57291	6.3997e-06	5.91462e-05
9054	4.56413	6.42551e-06	5.93538e-05
80313	-4.55972	6.51535e-06	6.01522e-05
27340	4.56005	6.54638e-06	6.04071e-05
728780	-4.55791	6.55582e-06	6.04626e-05
10761	4.56853	6.56468e-06	6.05128e-05
5067	-4.55716	6.575e-06	6.05764e-05
9465	-4.5574	6.57976e-06	6.05886e-05
64417	4.56195	6.58936e-06	6.06139e-05
10059	4.57017	6.58797e-06	6.06139e-05
10920	4.56173	6.60201e-06	6.06751e-05
9122	-4.55945	6.60288e-06	6.06751e-05
220988	4.55953	6.61216e-06	6.07288e-05
4283	4.55631	6.67347e-06	6.12601e-05
9728	-4.55344	6.69193e-06	6.13976e-05
28316	-4.55452	6.71718e-06	6.15973e-05
501	-4.55703	6.72943e-06	6.16458e-05
427	-4.55289	6.72679e-06	6.16458e-05
6884	4.55486	6.74378e-06	6.17453e-05
3301	4.55808	6.76664e-06	6.19224e-05
114769	-4.55185	6.77954e-06	6.20084e-05
342184	-4.55028	6.7846e-06	6.20226e-05
7260	4.55353	6.81533e-06	6.22392e-05
80196	4.55335	6.81529e-06	6.22392e-05
8187	4.55174	6.84534e-06	6.2481e-05
8935	4.55216	6.85672e-06	6.25526e-05
55738	4.54748	6.87223e-06	6.26617e-05
6819	-4.54825	6.87658e-06	6.26691e-05
9130	4.5479	6.9292e-06	6.30836e-05
342574	-4.54781	6.92825e-06	6.30836e-05
9887	4.54732	6.93765e-06	6.31279e-05
4221	4.54821	6.98264e-06	6.35047e-05
54535	4.54675	6.98641e-06	6.35063e-05
54947	-4.5454	6.99302e-06	6.35337e-05
51068	4.54831	7.00754e-06	6.36329e-05
55975	4.54277	7.06144e-06	6.40895e-05
55154	4.54582	7.06953e-06	6.413e-05
54910	4.54335	7.08459e-06	6.42336e-05
8408	4.54193	7.09252e-06	6.42726e-05
10897	4.54123	7.10468e-06	6.43498e-05
284018	4.54205	7.11512e-06	6.44113e-05
607	4.54235	7.13111e-06	6.45231e-05
2066	-4.53887	7.16315e-06	6.47479e-05
55332	-4.53933	7.16328e-06	6.47479e-05
91661	4.5464	7.18856e-06	6.49431e-05
8939	4.53879	7.27817e-06	6.57191e-05
246243	4.53879	7.28469e-06	6.57444e-05
144455	4.54327	7.29251e-06	6.57663e-05
79796	4.55715	7.29455e-06	6.57663e-05
25914	4.54676	7.30901e-06	6.58631e-05
284069	4.53457	7.37292e-06	6.64051e-05
57179	-4.53131	7.44077e-06	6.69821e-05
84985	4.53036	7.47804e-06	6.72833e-05
57393	-4.52932	7.49138e-06	6.73691e-05
285672	-4.52827	7.53156e-06	6.76272e-05
26212	4.54632	7.52469e-06	6.76272e-05
79873	-4.52834	7.53071e-06	6.76272e-05
9455	-4.52818	7.54624e-06	6.77247e-05
6602	4.53459	7.55957e-06	6.78099e-05
10299	4.53293	7.57641e-06	6.79264e-05
3297	4.52684	7.61904e-06	6.8274e-05
150	-4.52578	7.63526e-06	6.83574e-05
26585	4.5257	7.63608e-06	6.83574e-05
9673	4.52761	7.64037e-06	6.83612e-05
283	-4.5251	7.64871e-06	6.84012e-05
253935	-4.52366	7.67814e-06	6.86297e-05
10622	4.53167	7.7229e-06	6.89949e-05
2968	4.52403	7.74086e-06	6.91204e-05
89891	4.52141	7.78437e-06	6.94738e-05
83989	-4.52062	7.80107e-06	6.95878e-05
115024	4.52251	7.80623e-06	6.95987e-05
56970	4.51796	7.88065e-06	7.02268e-05
284390	-4.51568	7.93767e-06	7.06993e-05
64897	4.51874	7.94526e-06	7.07312e-05
23223	4.51547	7.99347e-06	7.11245e-05
256126	4.52312	8.01782e-06	7.13054e-05
4686	4.51843	8.0533e-06	7.15849e-05
10493	4.51821	8.09468e-06	7.19166e-05
10969	4.51669	8.10771e-06	7.19961e-05
26009	4.51309	8.18883e-06	7.268e-05
6595	-4.51492	8.19699e-06	7.27159e-05
1810	4.51199	8.22293e-06	7.29094e-05
121506	-4.50623	8.32913e-06	7.38141e-05
3672	-4.50474	8.35375e-06	7.39951e-05
6950	4.50495	8.37404e-06	7.41377e-05
405753	-4.52722	8.42913e-06	7.45881e-05
[truncated: 5,183 more rows]
